# Supplementary material for: Pentacyclic Triterpene Profile and Its Biosynthetic Pathway in Cecropia telenitida as a Prospective Dietary Supplement
Source: PubMed Central journal article supplement (PMC7922737; doi:10.3390/molecules26041064), 2021-02-18
Supplement: molecules-26-01064-s001.pdf [file molecules-26-01064-s001.pdf]

**Supplementary information: Pentacyclic triterpene profile and its biosynthetic pathway in *Cecropia telenitida* as a prospect type 2 diabetes dietary supplement**

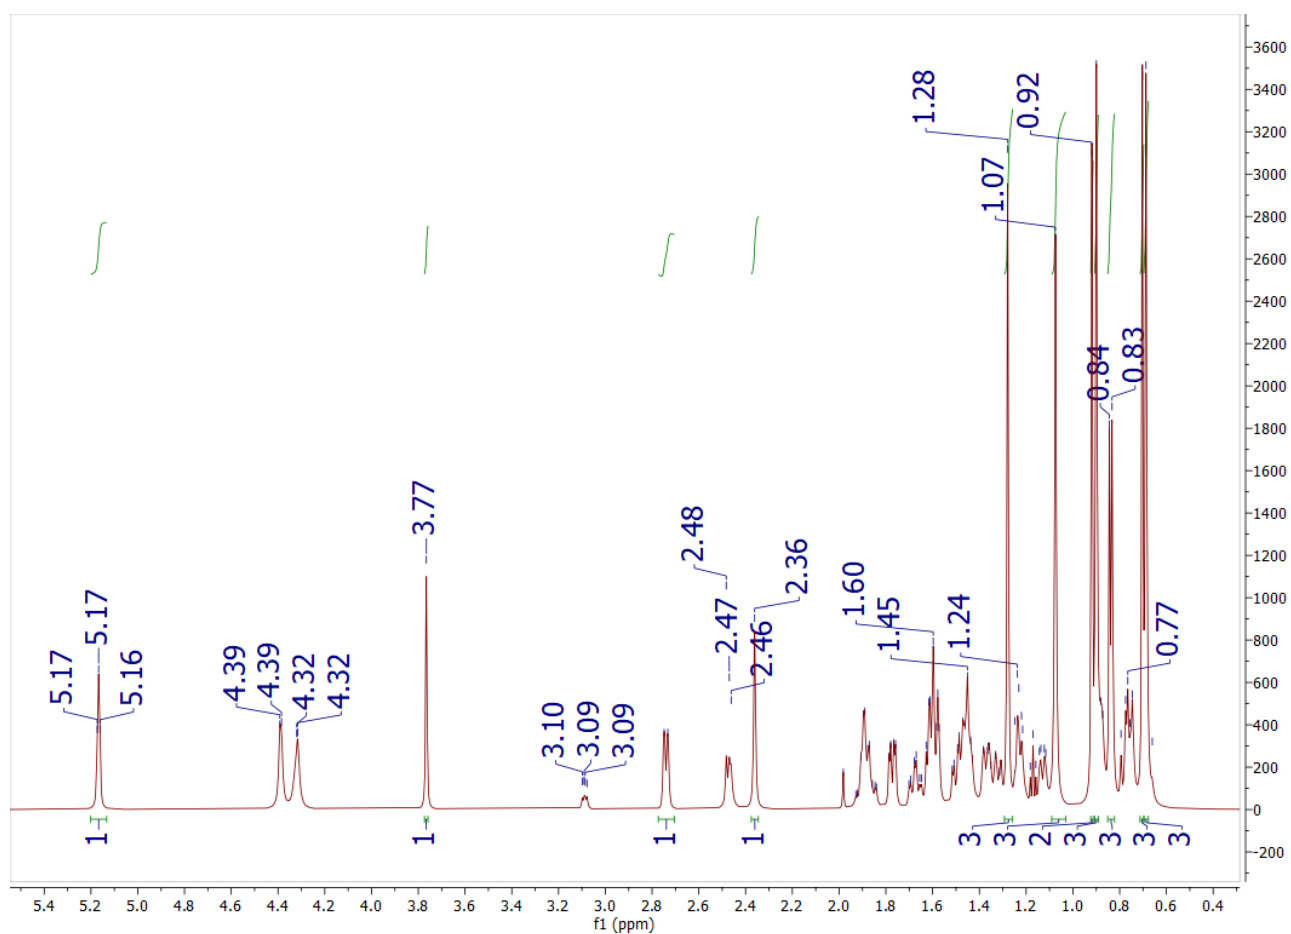

**Figure S1.**  $R_t$  17.94 min peak <sup>1</sup>H-NMR spectrum. Isoyarumic acid.

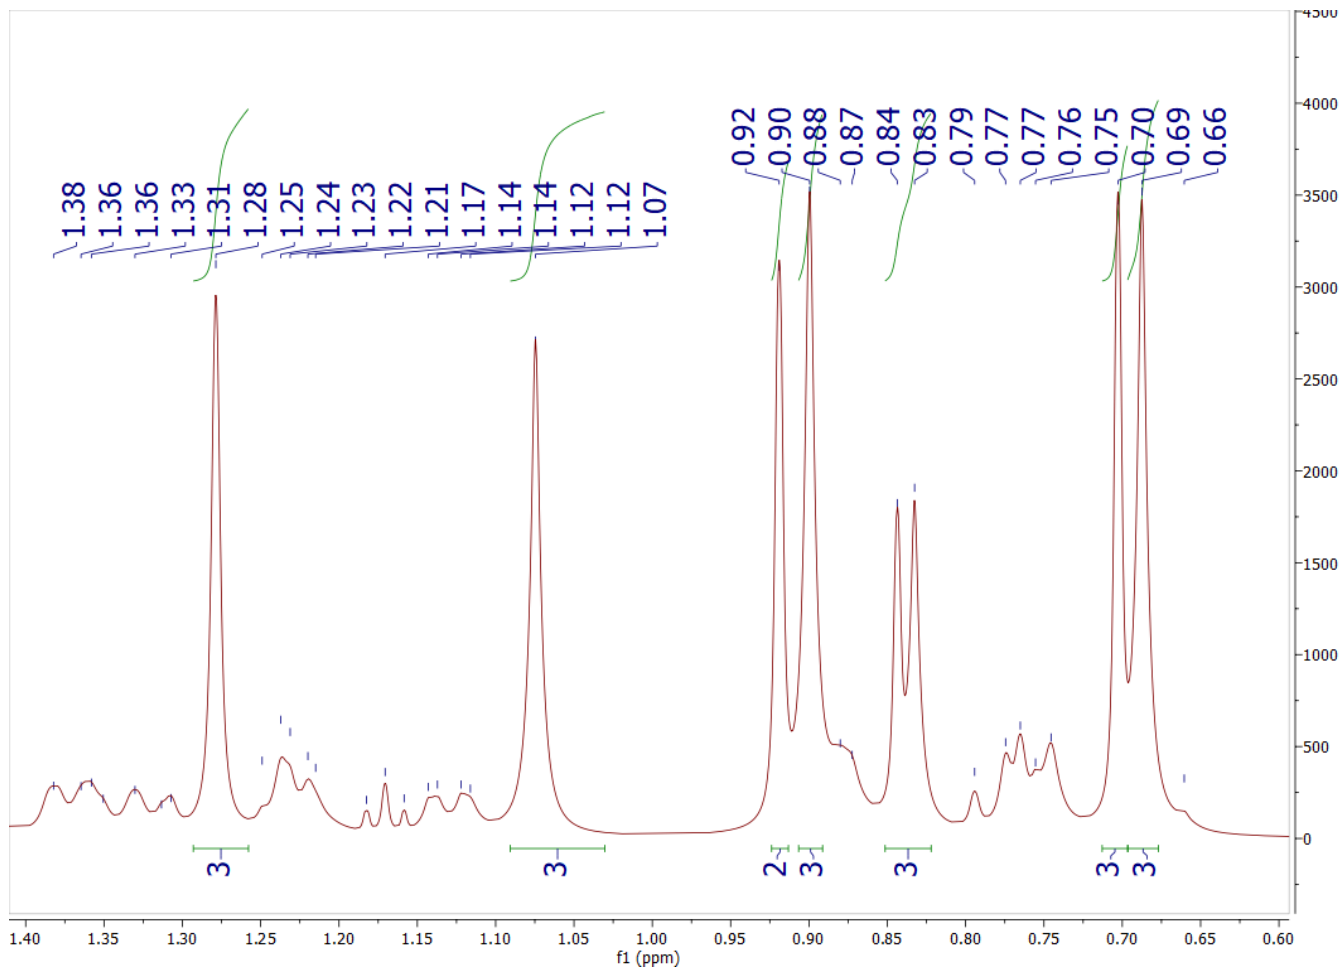

**Figure S2.**  $R_t$  17.94 min peak <sup>1</sup>H-NMR spectrum, zoom over 0.60 to 1.40 ppm region. Isoyaramic acid

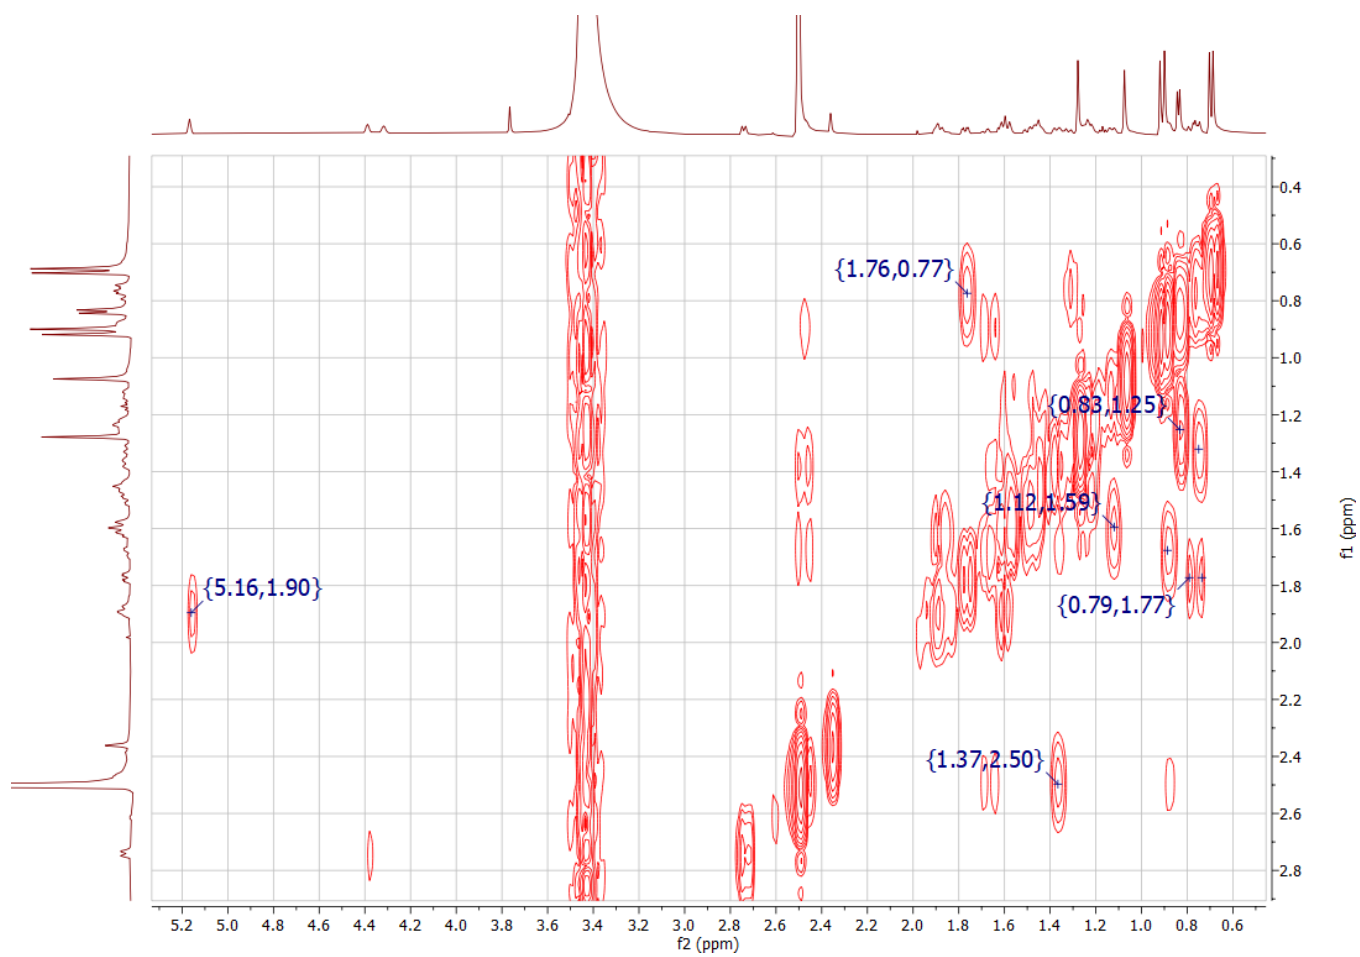

**Figure S3.**  $R_t$  17.94 min peak  $^1\text{H}$ - $^1\text{H}$  NMR correlation (COSY) spectrum. Isoyarumic acid.

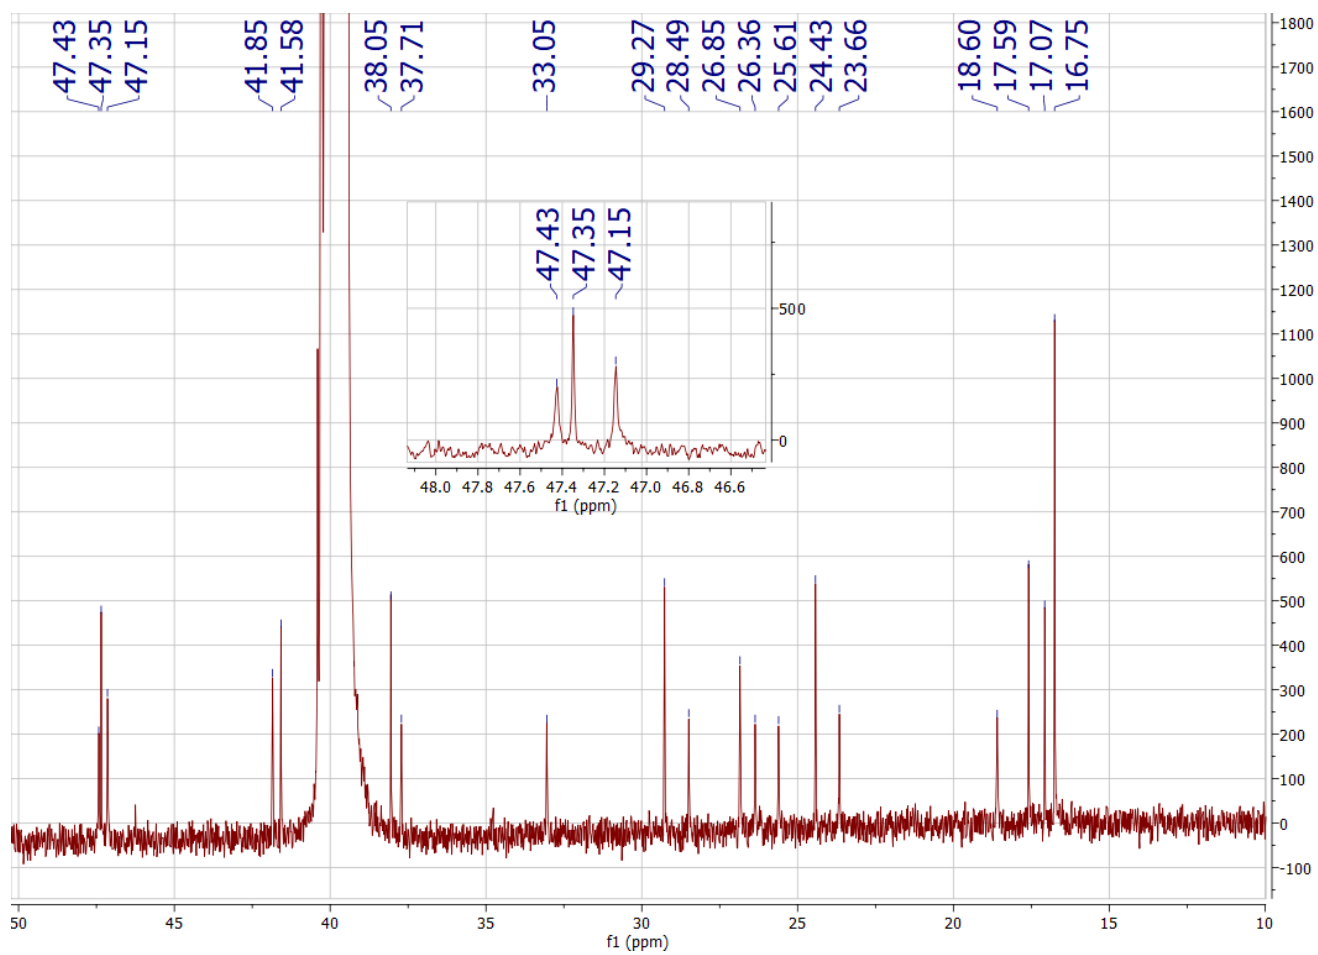

**Figure S4.**  $R_t$  17.94 min peak  $^{13}\text{C}$ -NMR spectrum, zoom over 10 to 50 ppm region. Isoyarumic acid.

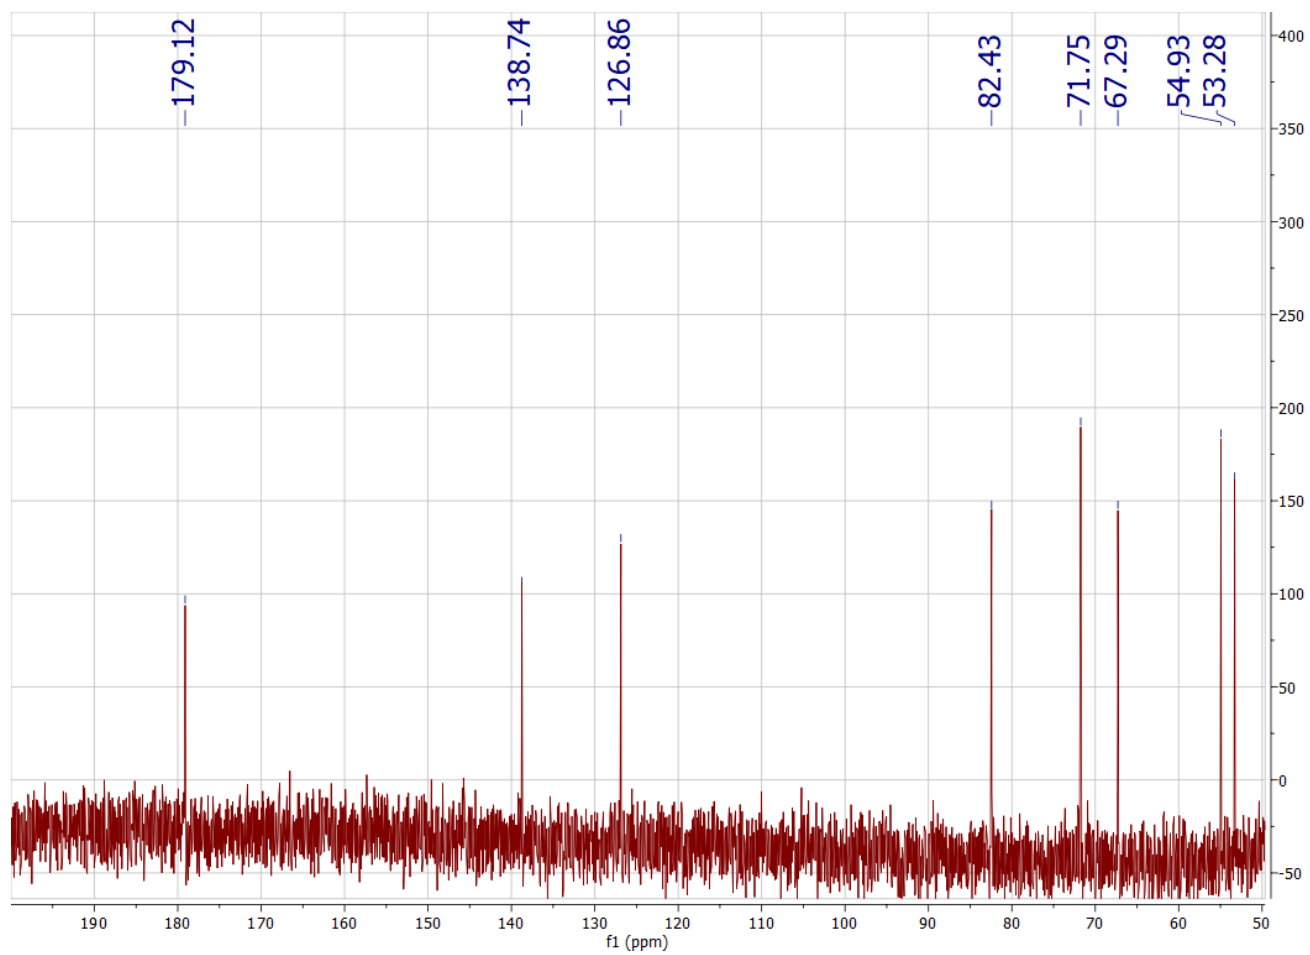

**Figure S5.**  $R_t$  17.94 min peak  $^{13}\text{C}$ -NMR spectrum, zoom over 50 to 200 ppm region. Isoyarumic acid.

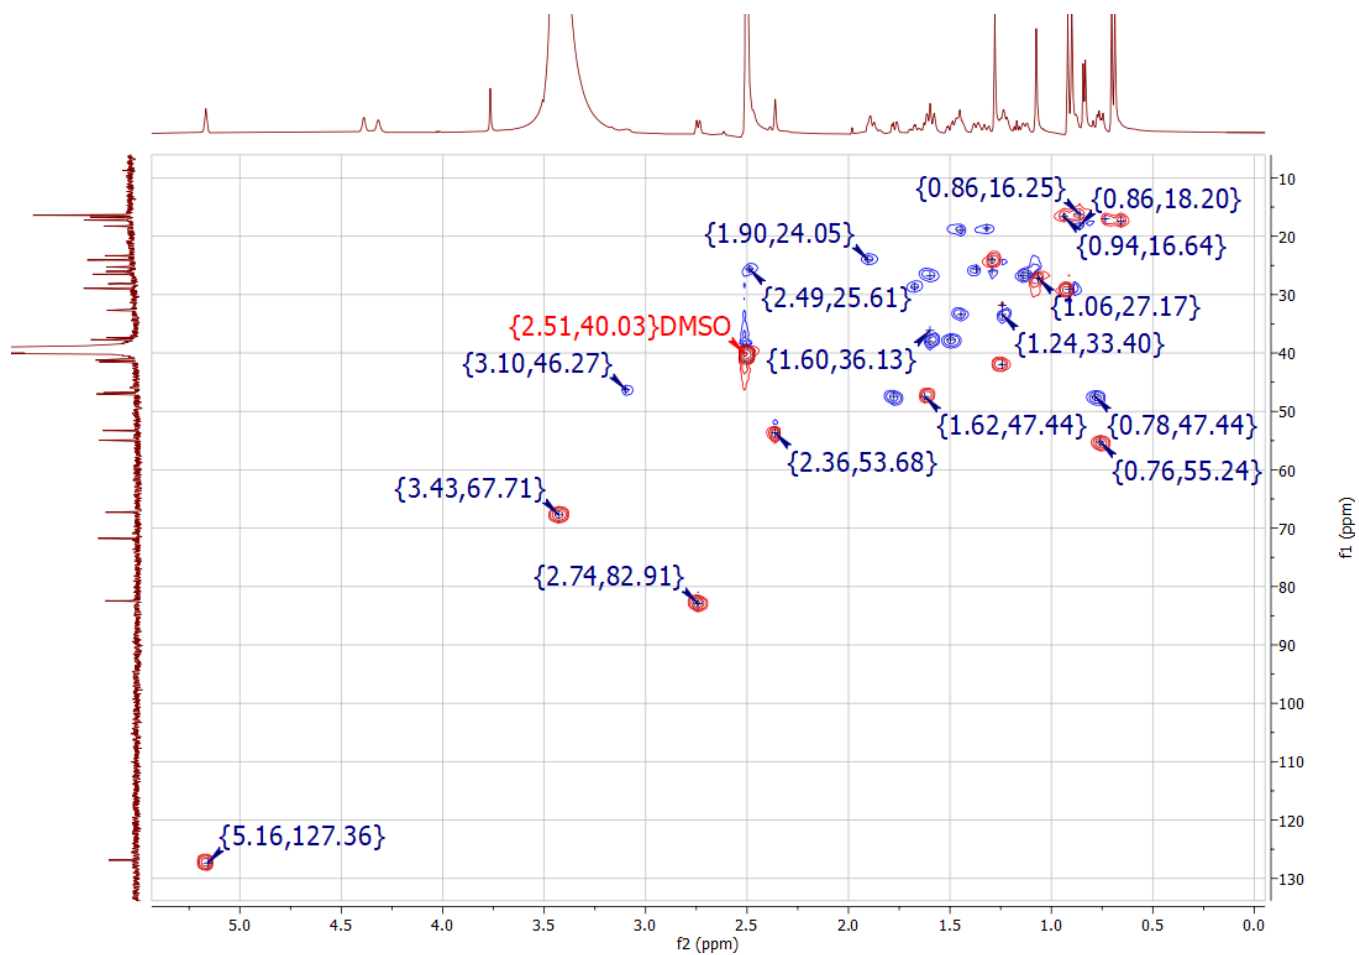

**Figure S6.**  $R_t$  17.94 min peak  $^1\text{H}$ - $^{13}\text{C}$  NMR correlation (HSQC) spectrum. Isoyarumic acid.

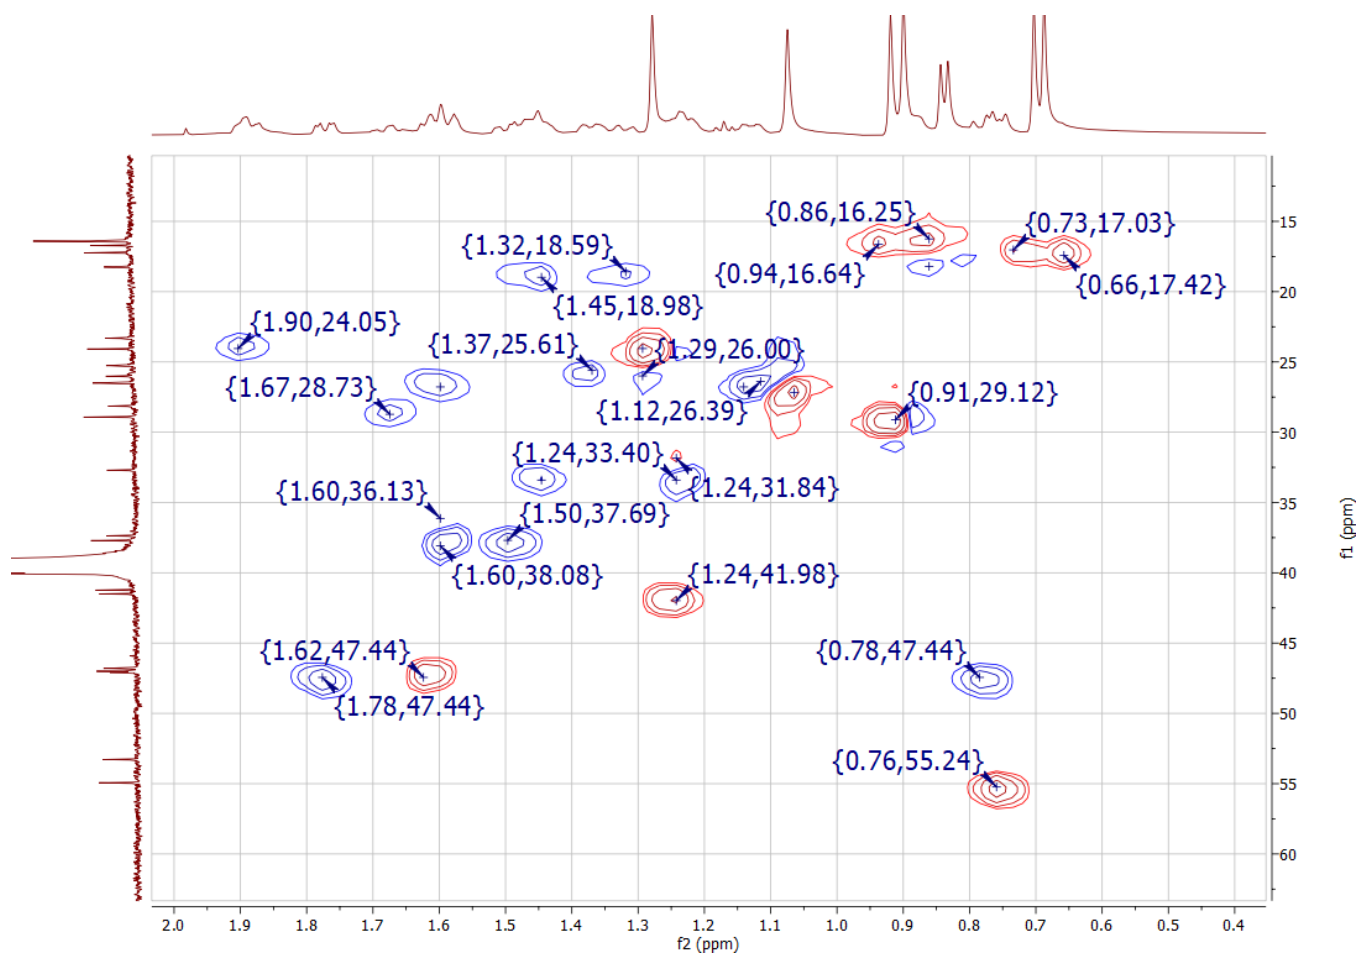

**Figure S7.**  $R_t$  17.94 min peak  $^1\text{H}$ - $^{13}\text{C}$  NMR correlation (HSQC) spectrum, zoom over 15 to 60 ppm ( $f_1$ ) and 0.4 to 2.0 ppm ( $f_2$ ). Isoyarumic acid.

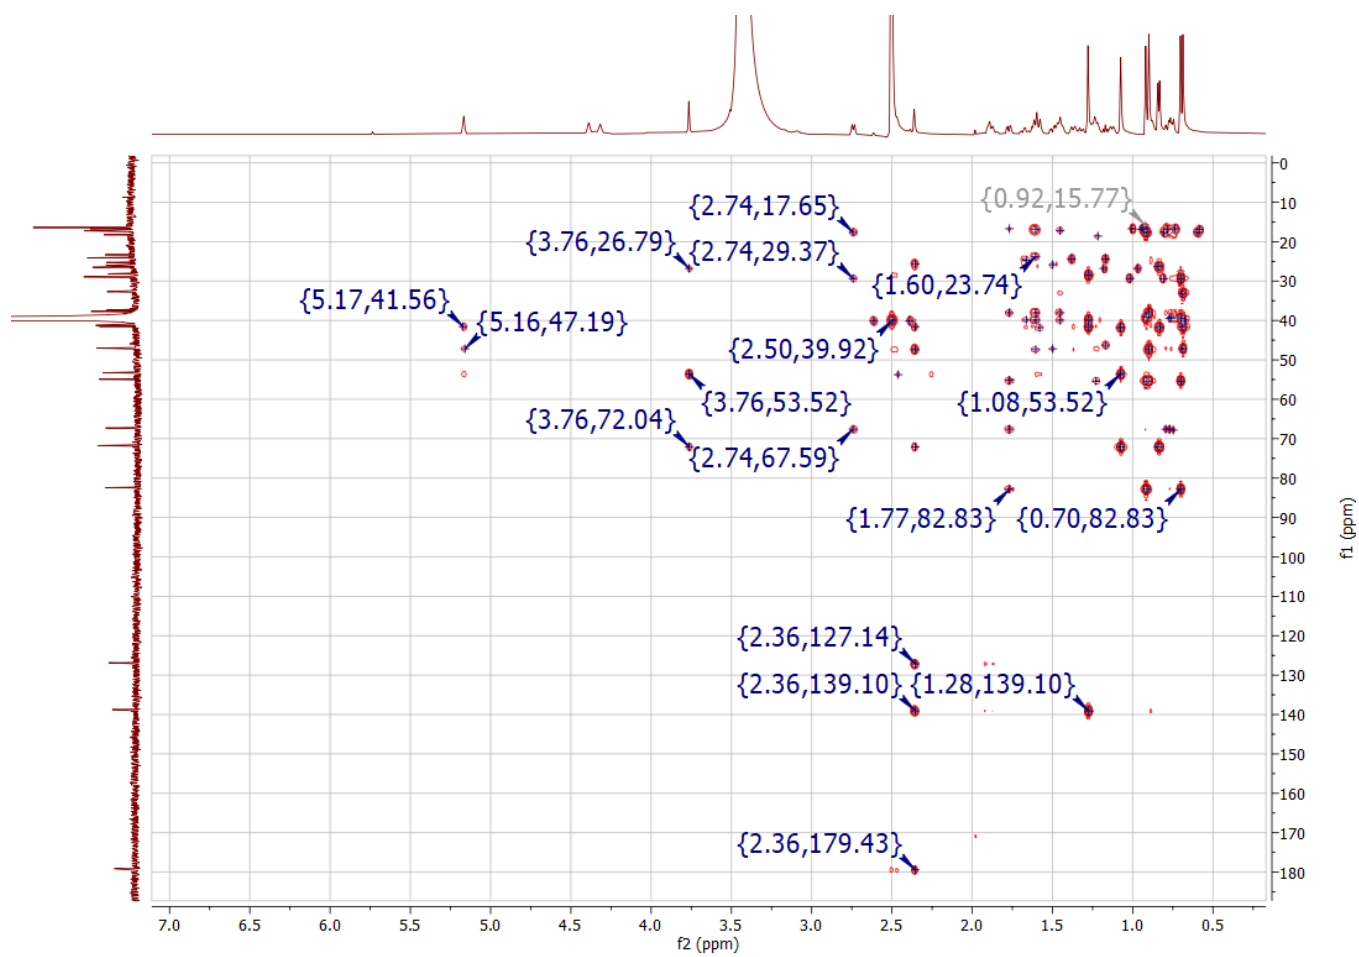

**Figure S8.**  $R_t$  17.94 min peak  $^1\text{H}$ - $^{13}\text{C}$  NMR correlation (HMBC) spectrum. Isoyarumic acid.



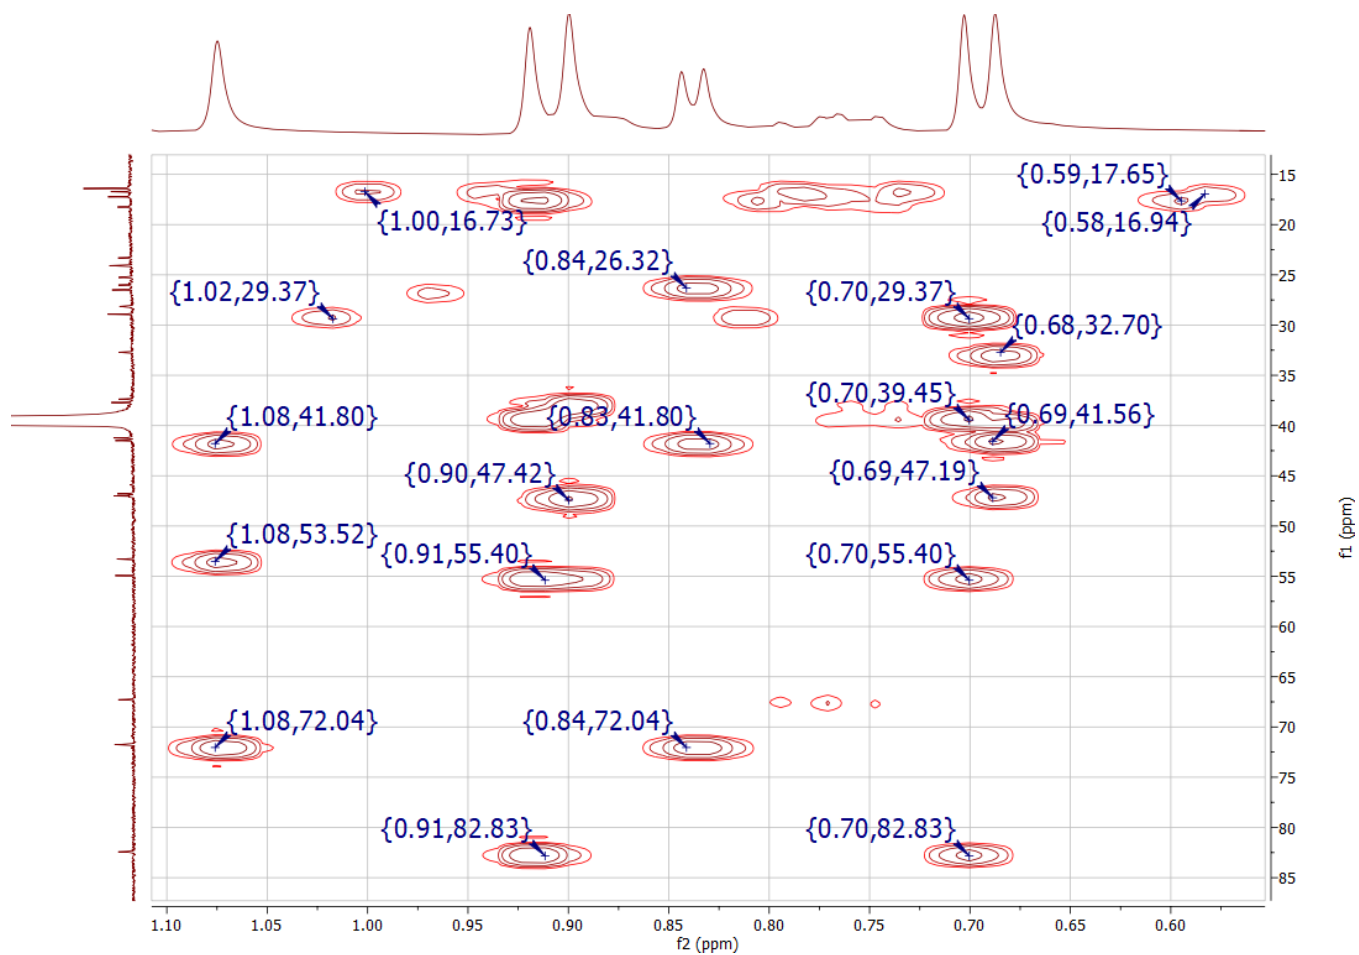

**Figure S9.**  $R_t$  17.94 min peak  $^1\text{H}$ - $^{13}\text{C}$  NMR correlation (HMBC) spectrum, zoom over 15 to 85 ppm ( $f_1$ ) and 0.5 to 1.10 ppm ( $f_2$ ). Isoyarumic acid.

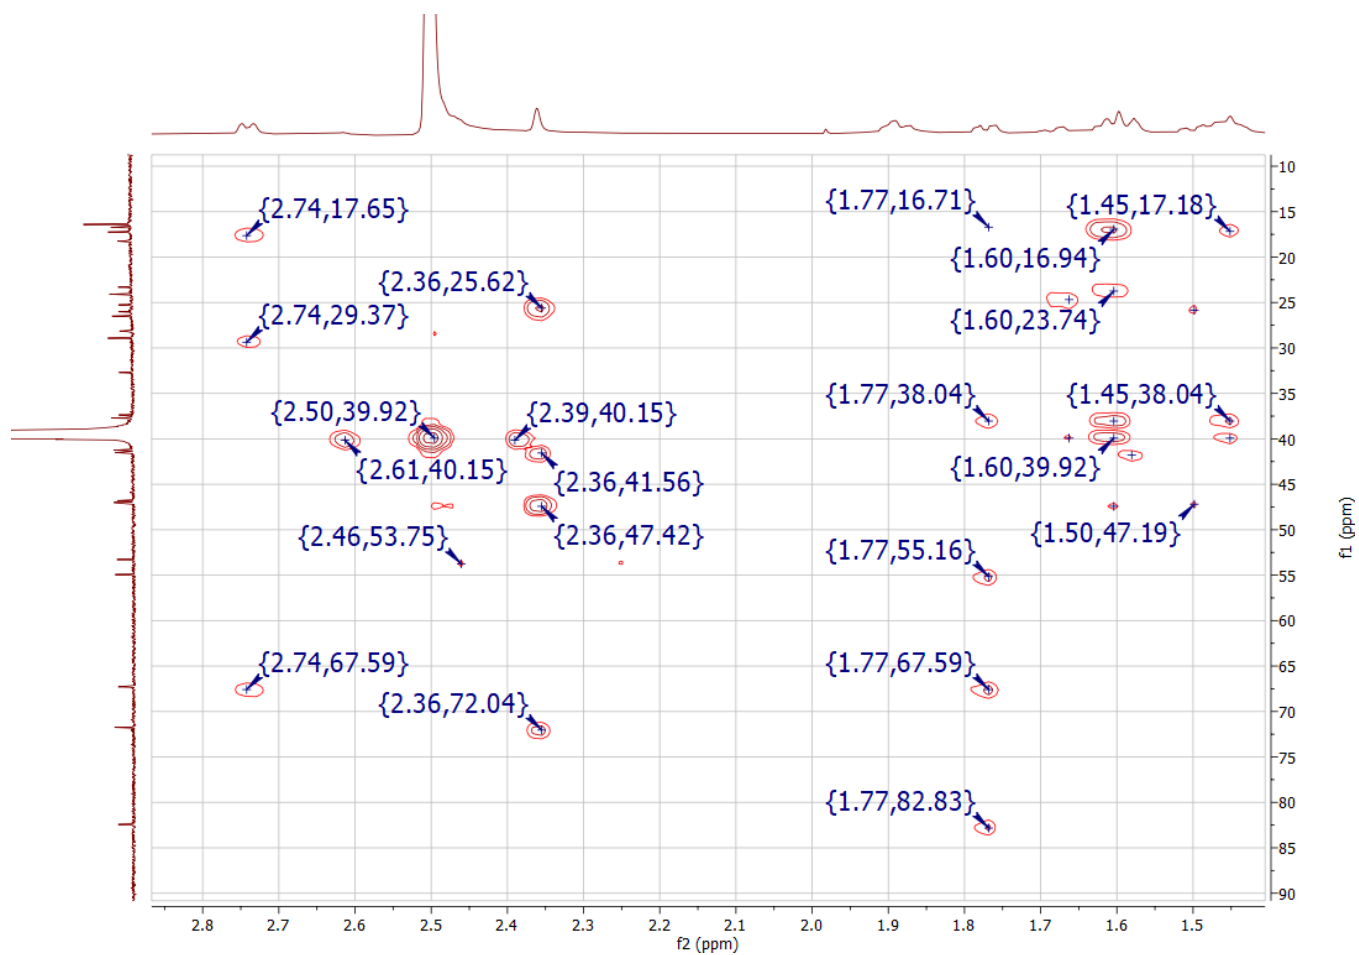

**Figure S9.**  $R_t$  17.94 min peak  $^1\text{H}$ - $^{13}\text{C}$  NMR correlation (HMBC) spectrum, zoom over 10 to 90 ppm ( $f_1$ ) and 1.0 to 2.8 ppm ( $f_2$ ). Isoyarumic acid.

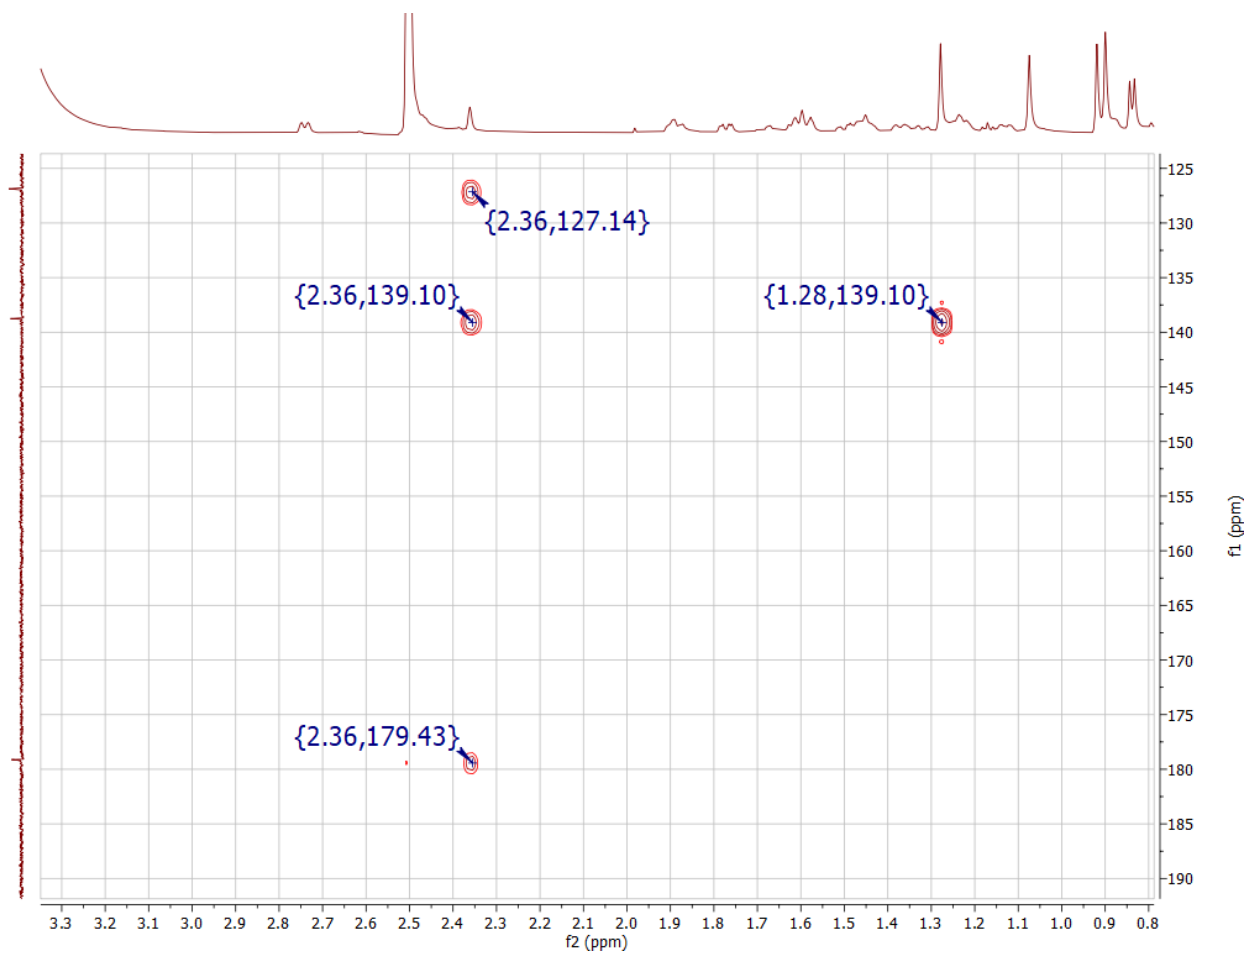

**Figure S9.**  $R_t$  17.94 min peak  $^1\text{H}$ - $^{13}\text{C}$  NMR correlation (HMBC) spectrum, zoom over 125 to 190 ppm ( $f_1$ ) and 0.8 to 3.3 ppm ( $f_2$ ). Isoyarumic acid.

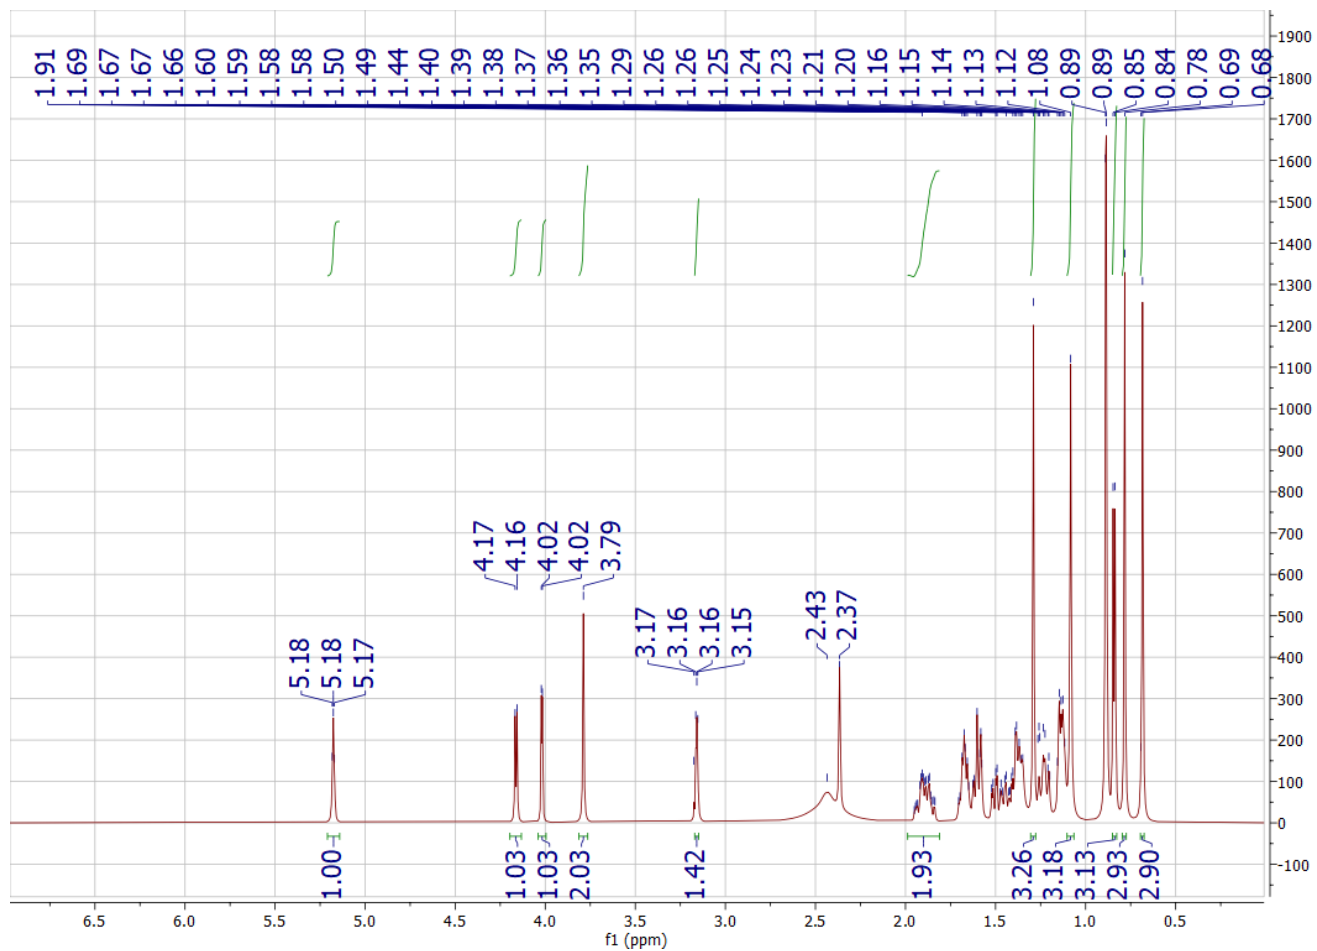

Figure S10.  $R_t$  23.31 min peak <sup>1</sup>H-NMR spectrum. Tormentica acid.

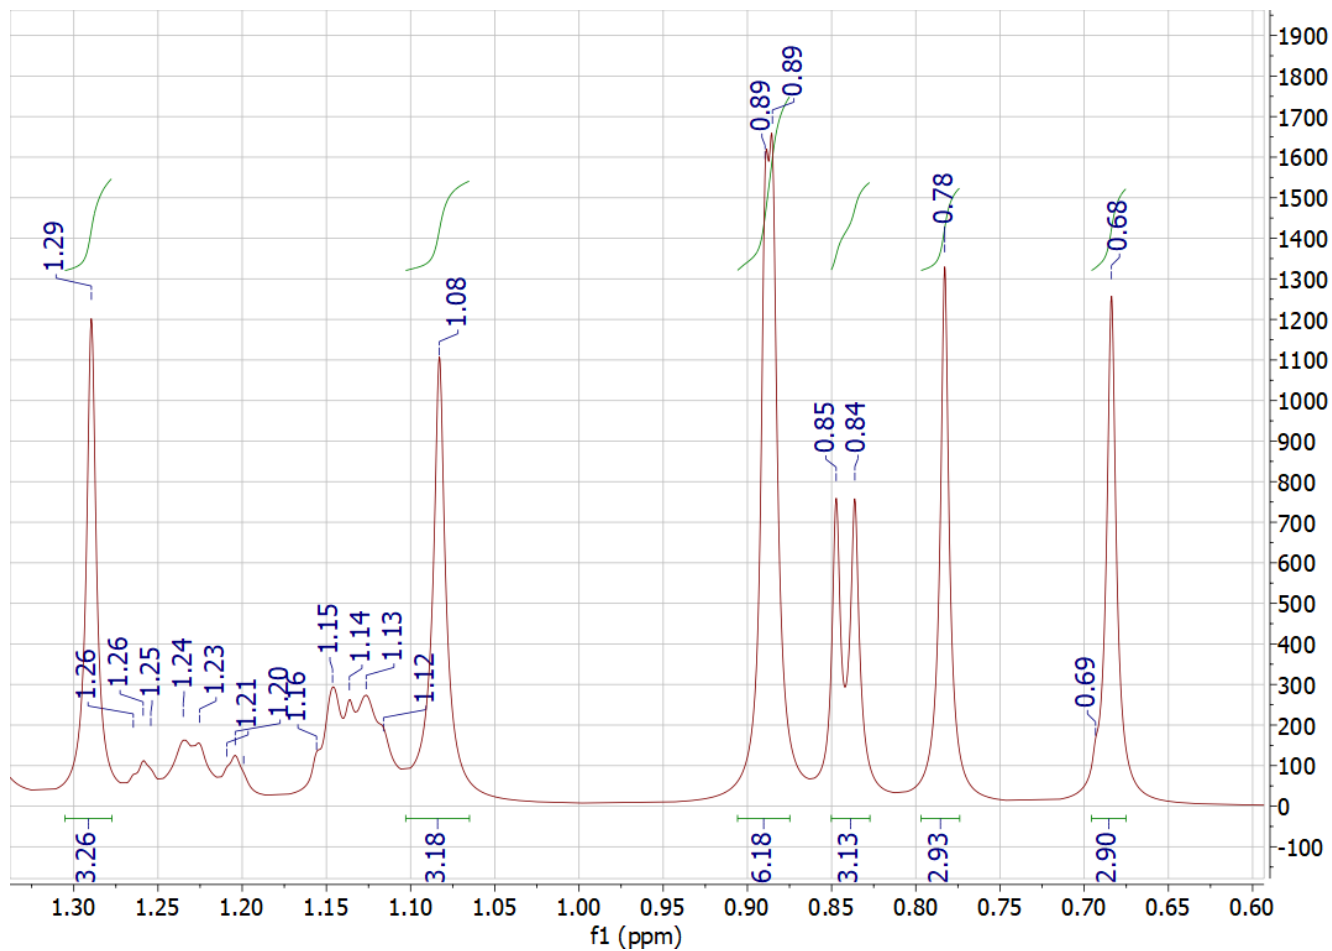

**Figure S11.**  $R_t$  23.31 min peak  $^1\text{H-NMR}$  spectrum, zoom over 0.60 to 1.40 ppm region. Tormentic acid.

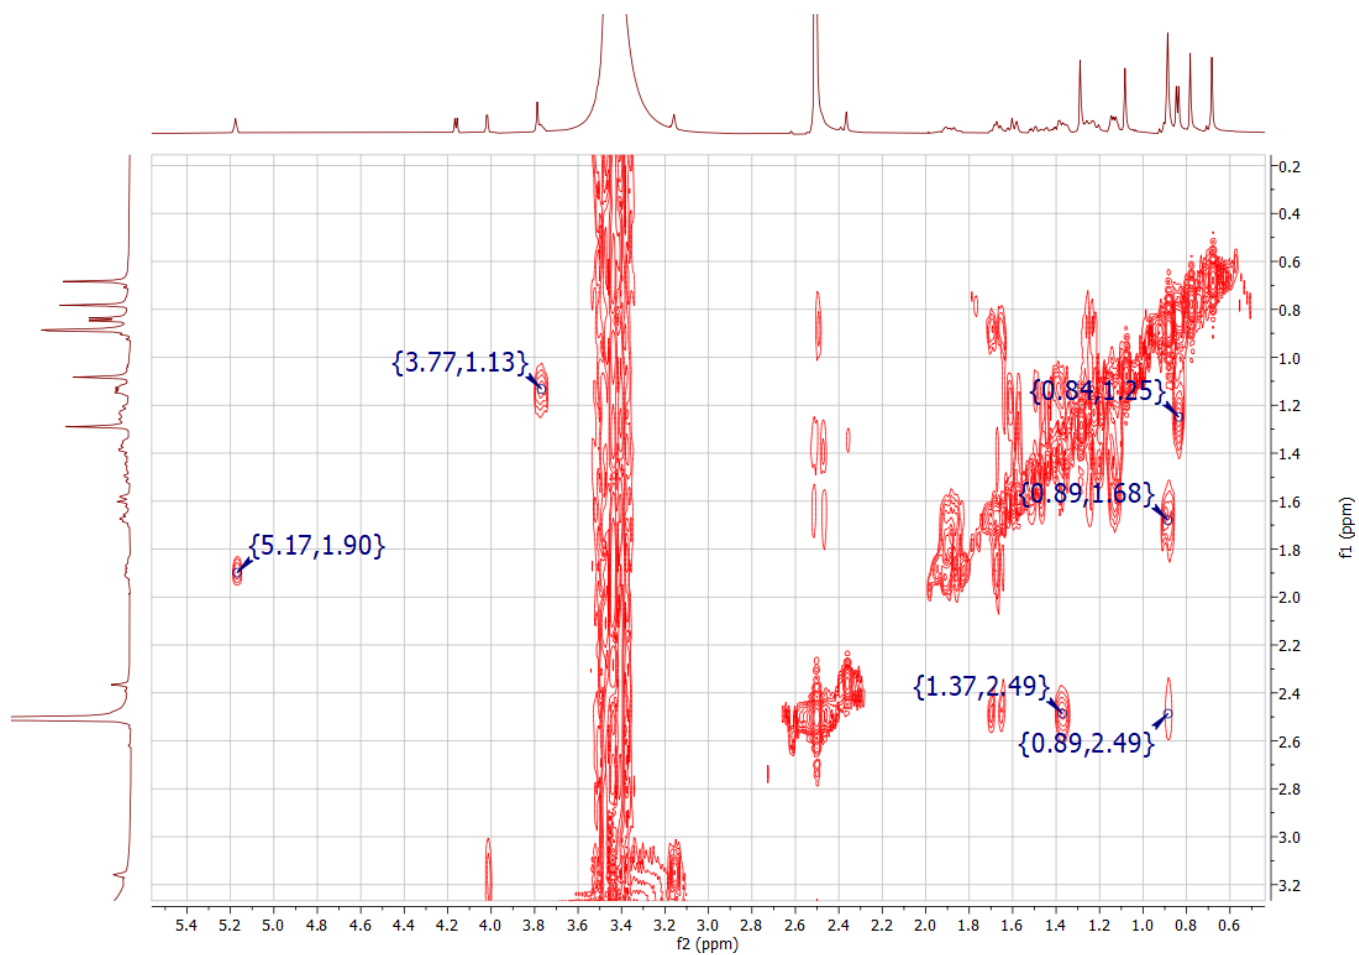

**Figure S12.**  $R_t$  23.31 min peak  $^1\text{H}$ - $^1\text{H}$  NMR correlation (COSY) spectrum. Tormentic acid.

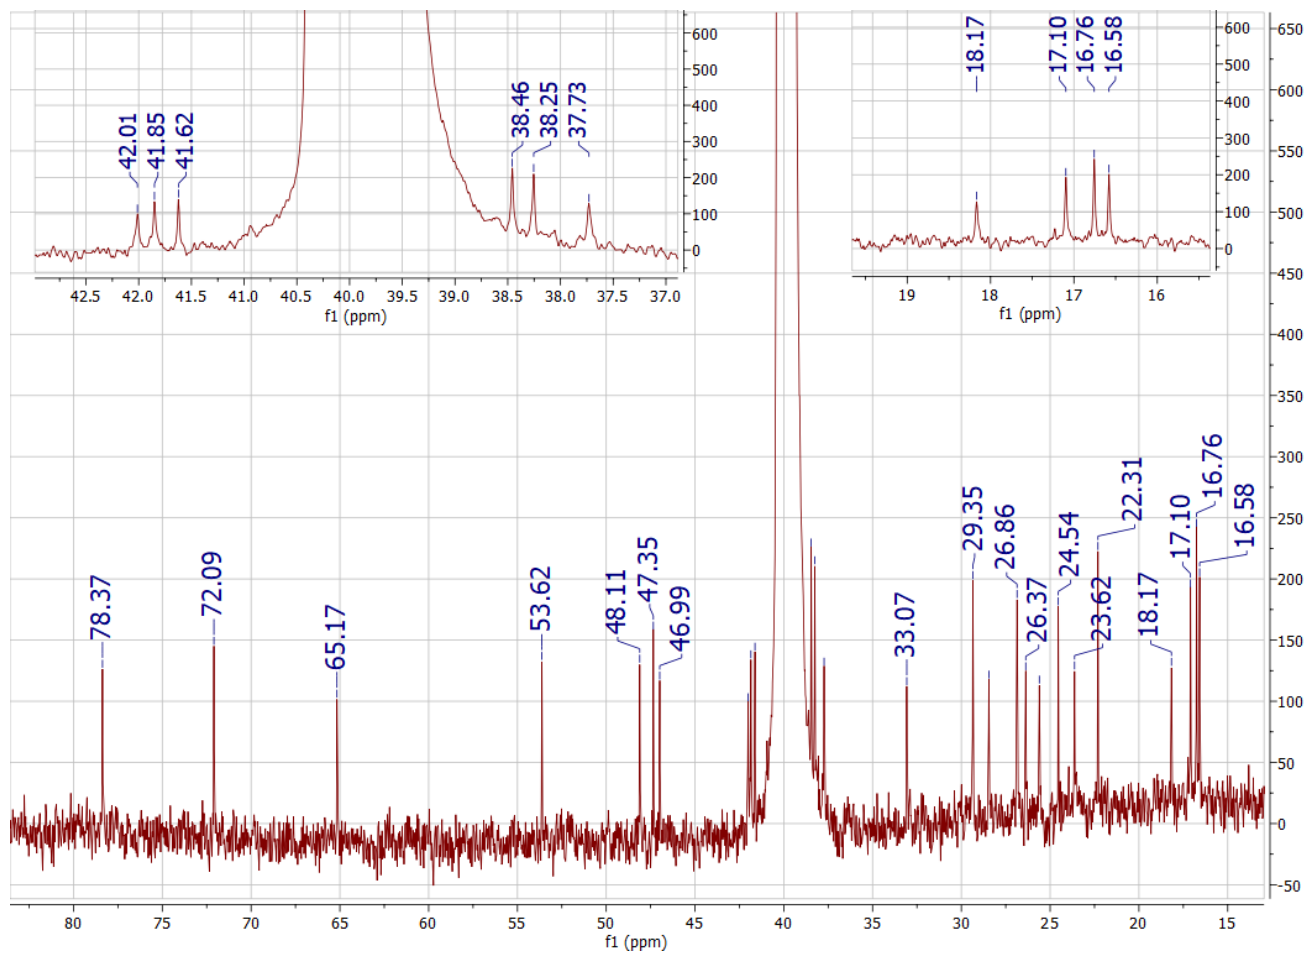

**Figure S13.**  $R_t$  23.31 min peak  $^{13}\text{C}$ -NMR spectrum, zoom over 15 to 80 ppm region. Tormentic acid.

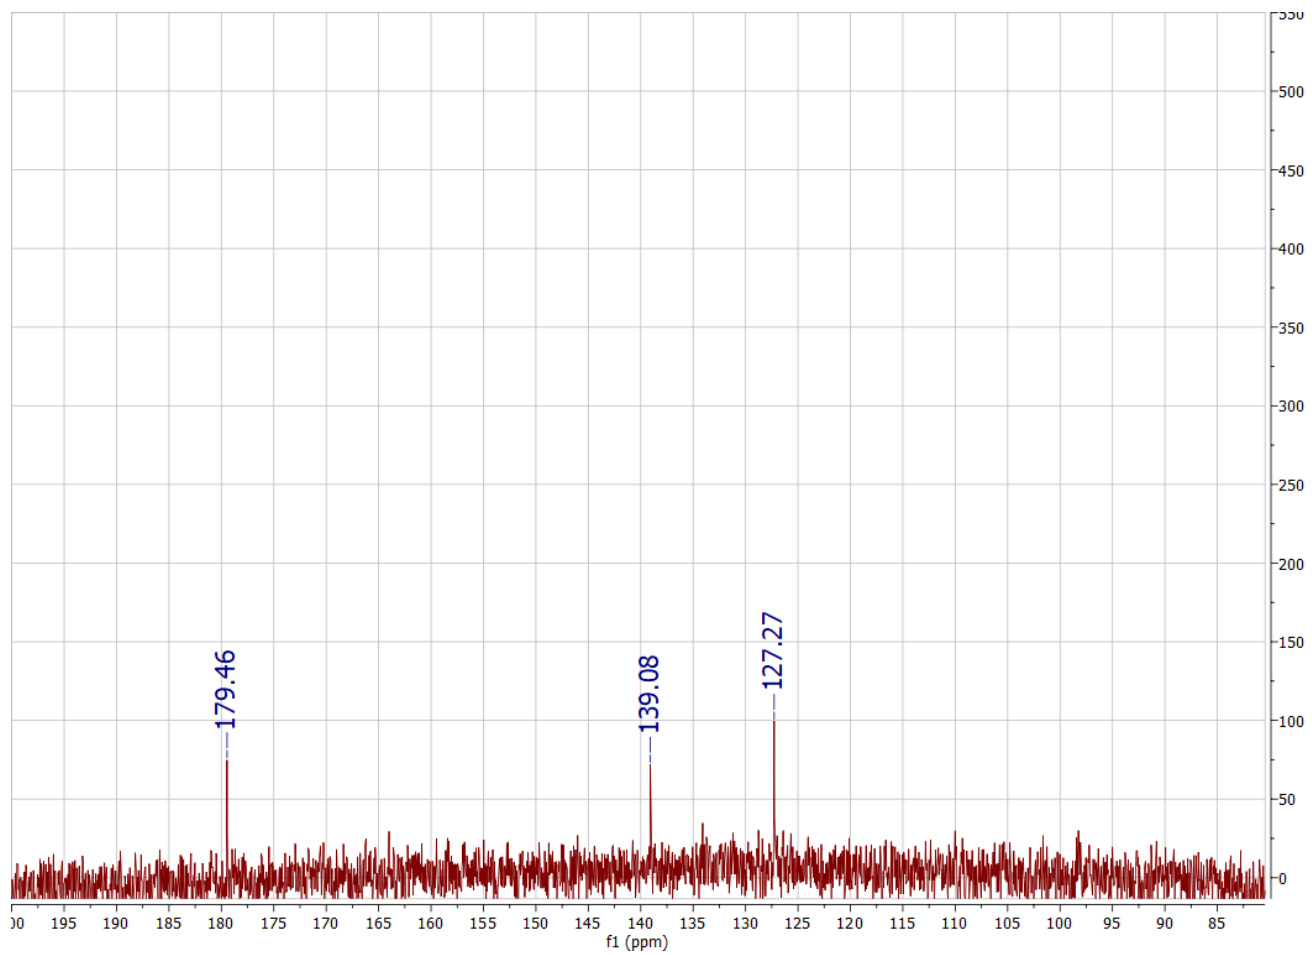

**Figure S14.**  $R_t$  23.31 min peak  $^{13}\text{C}$ -NMR spectrum, zoom over 80 to 200 ppm region. Tormentica acid.



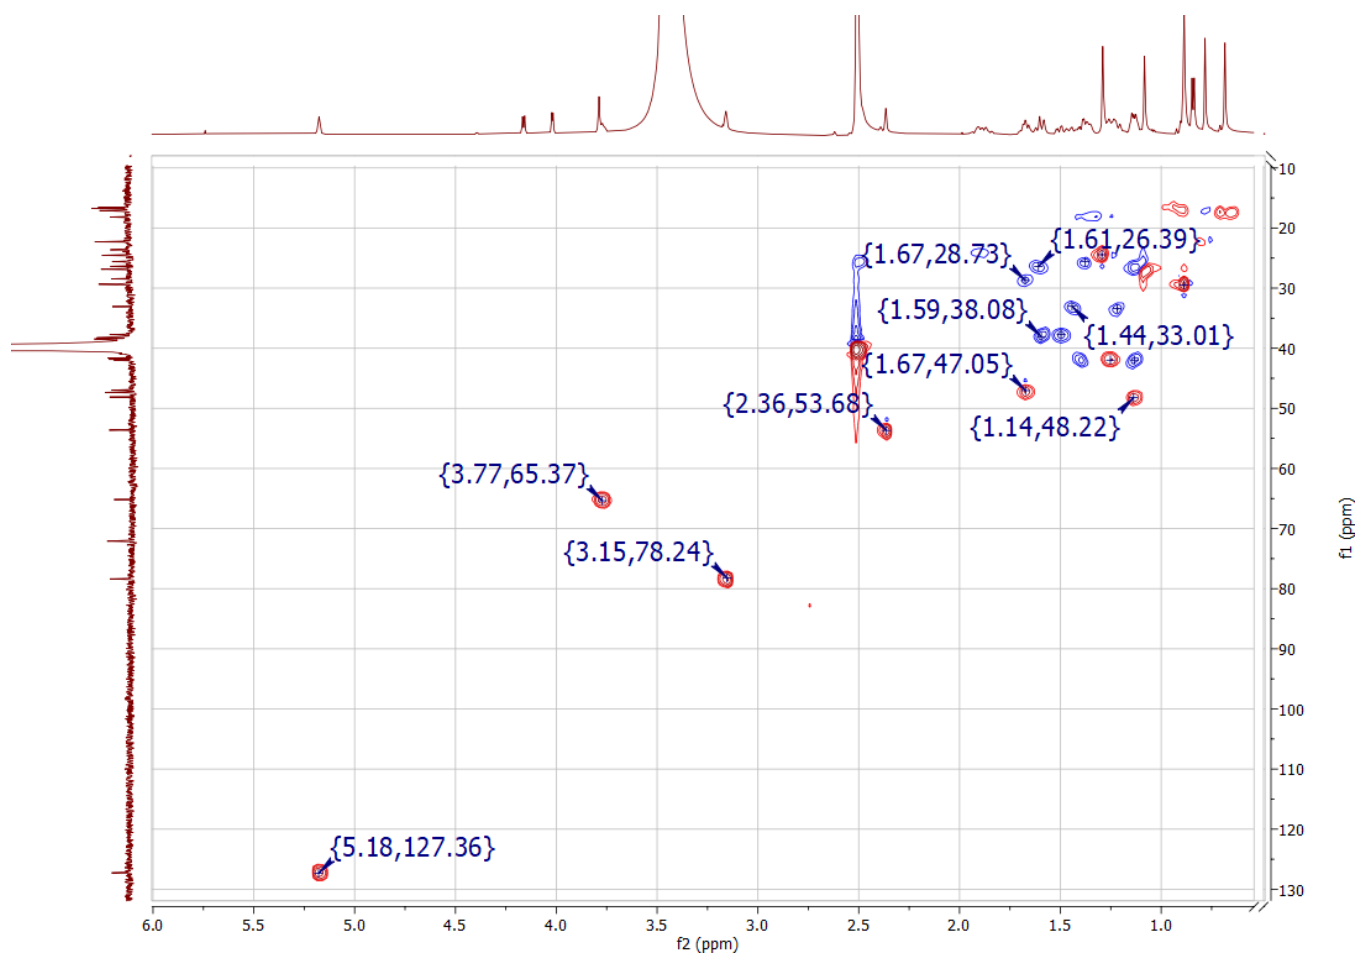

**Figure S15.**  $R_t$  23.31 min peak  $^1\text{H}$ - $^{13}\text{C}$  NMR correlation (HSQC) spectrum. Tormentica acid.

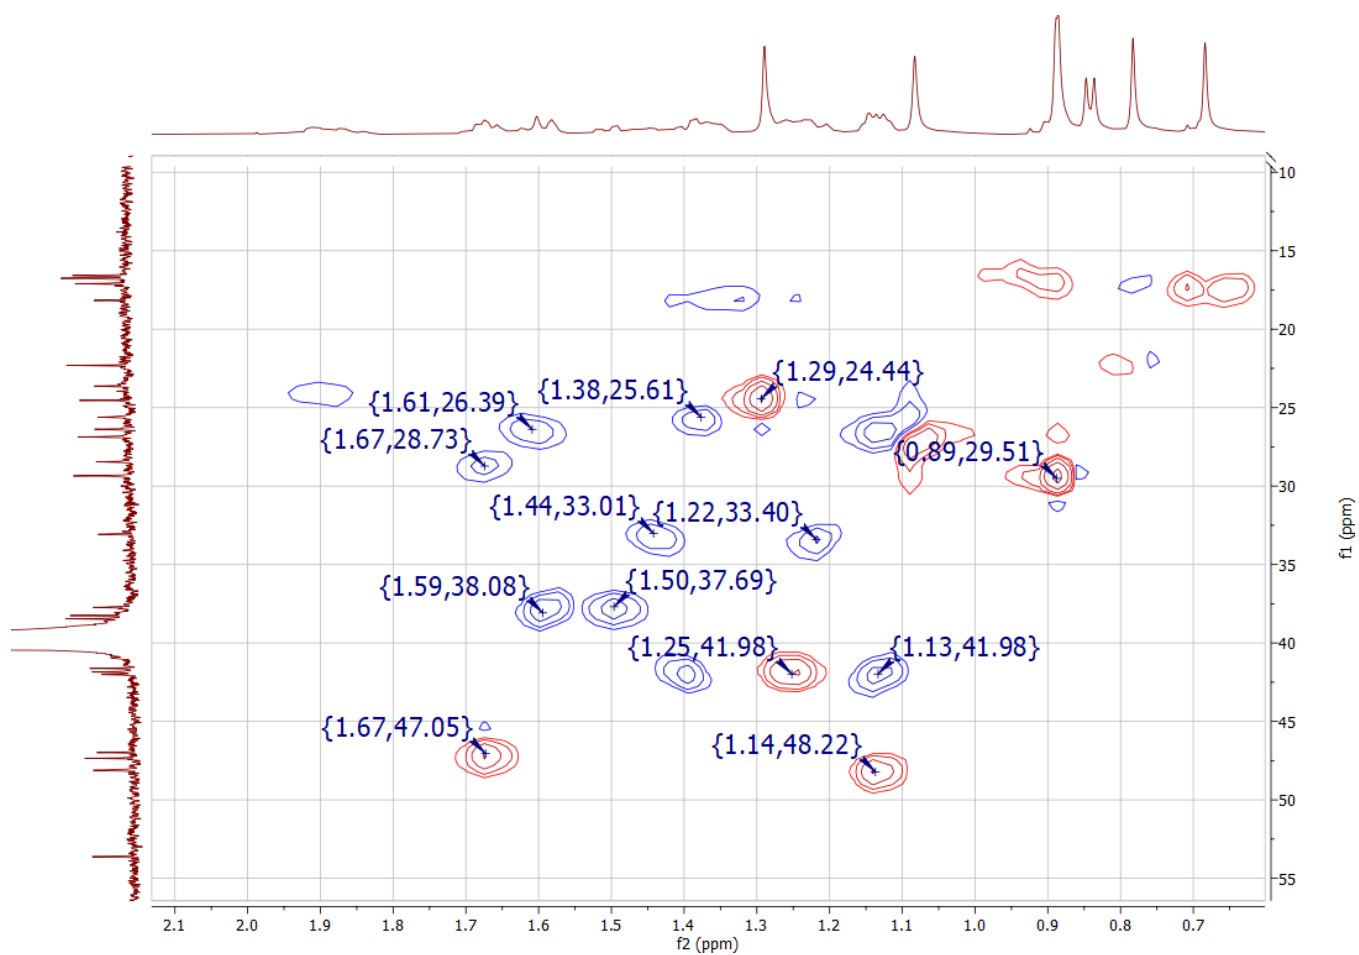

**Figure S16.**  $R_t$  23.31 min peak  $^1\text{H}$ - $^{13}\text{C}$  NMR correlation (HSQC) spectrum, zoom over 10 to 55 ppm ( $f_1$ ) and 0.6 to 2.1 ppm ( $f_2$ ). Tormentic acid.

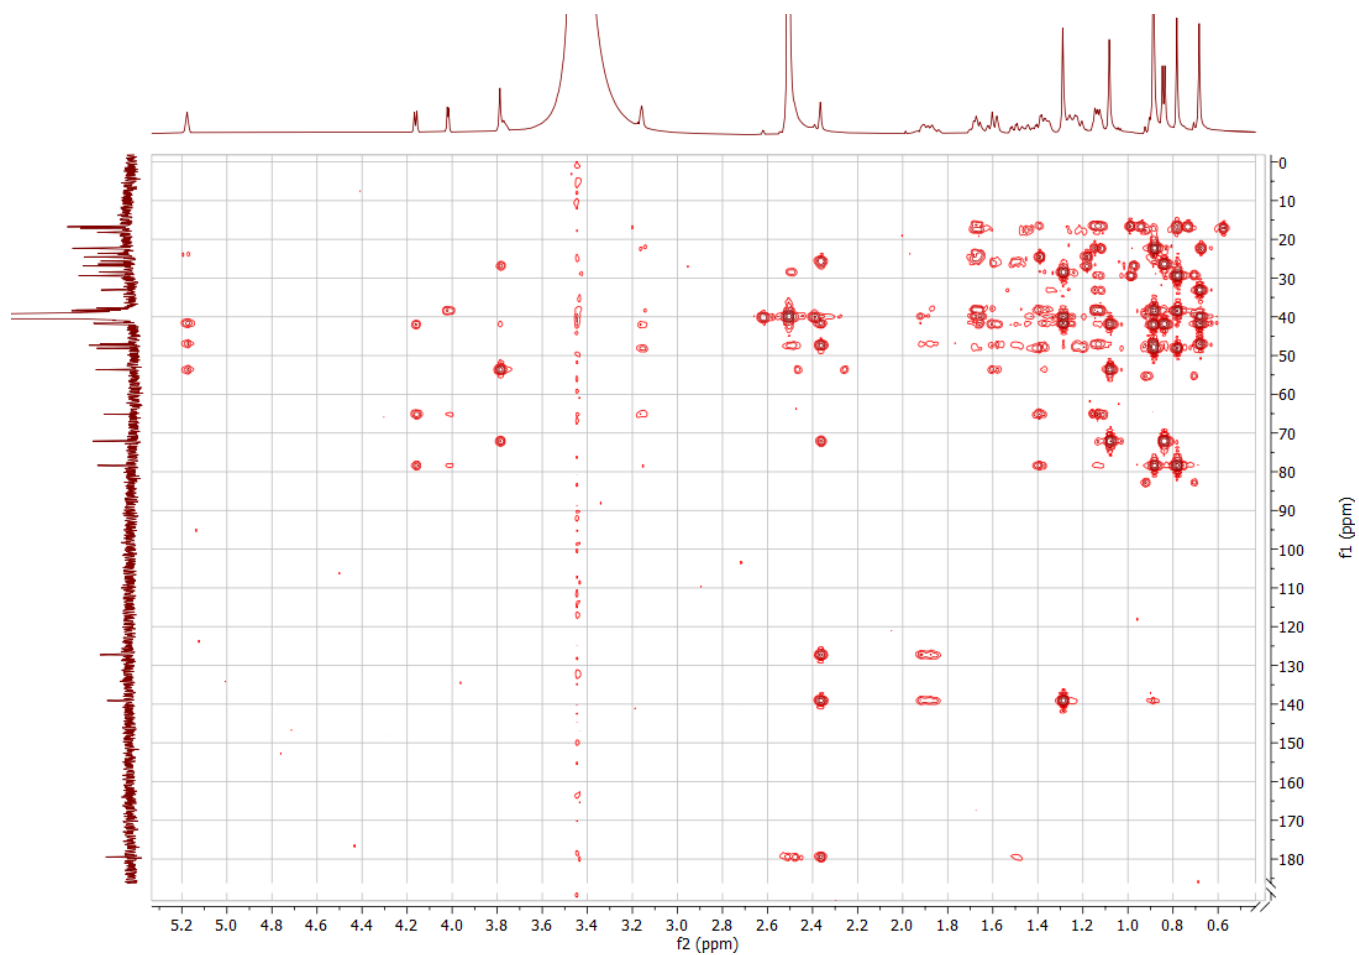

**Figure S17.**  $R_t$  23.31 min peak  $^1\text{H}$ - $^{13}\text{C}$  NMR correlation (HMBC) spectrum. Tormentica acid.

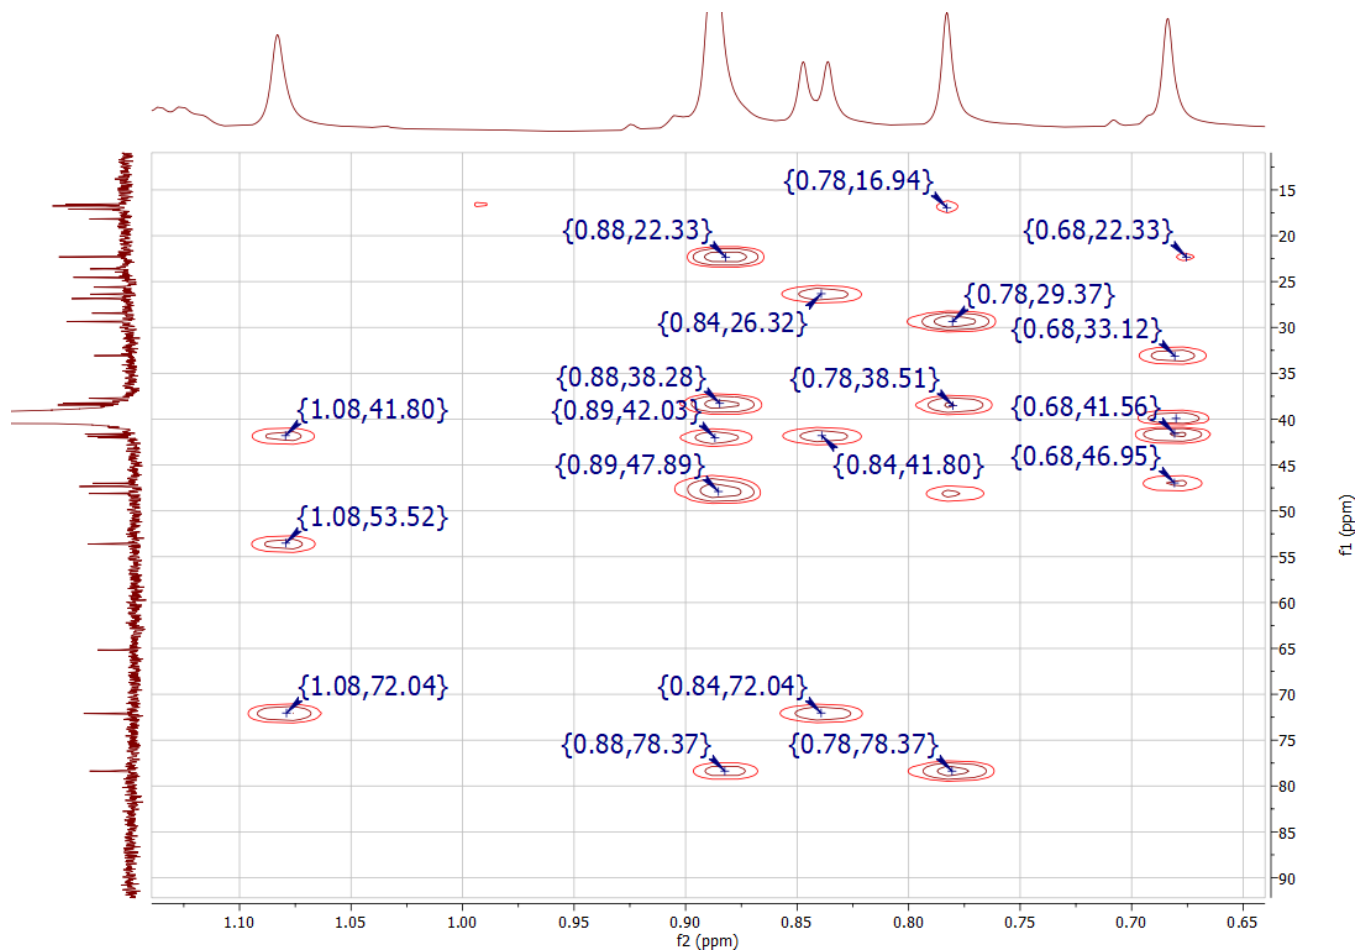

**Figure S18.**  $R_t$  23.31 min peak  $^1\text{H}$ - $^{13}\text{C}$  NMR correlation (HMBC) spectrum, zoom over 15 to 90 ppm ( $f_1$ ) and 0.65 to 1.10 ppm ( $f_2$ ). Tormentonic acid.

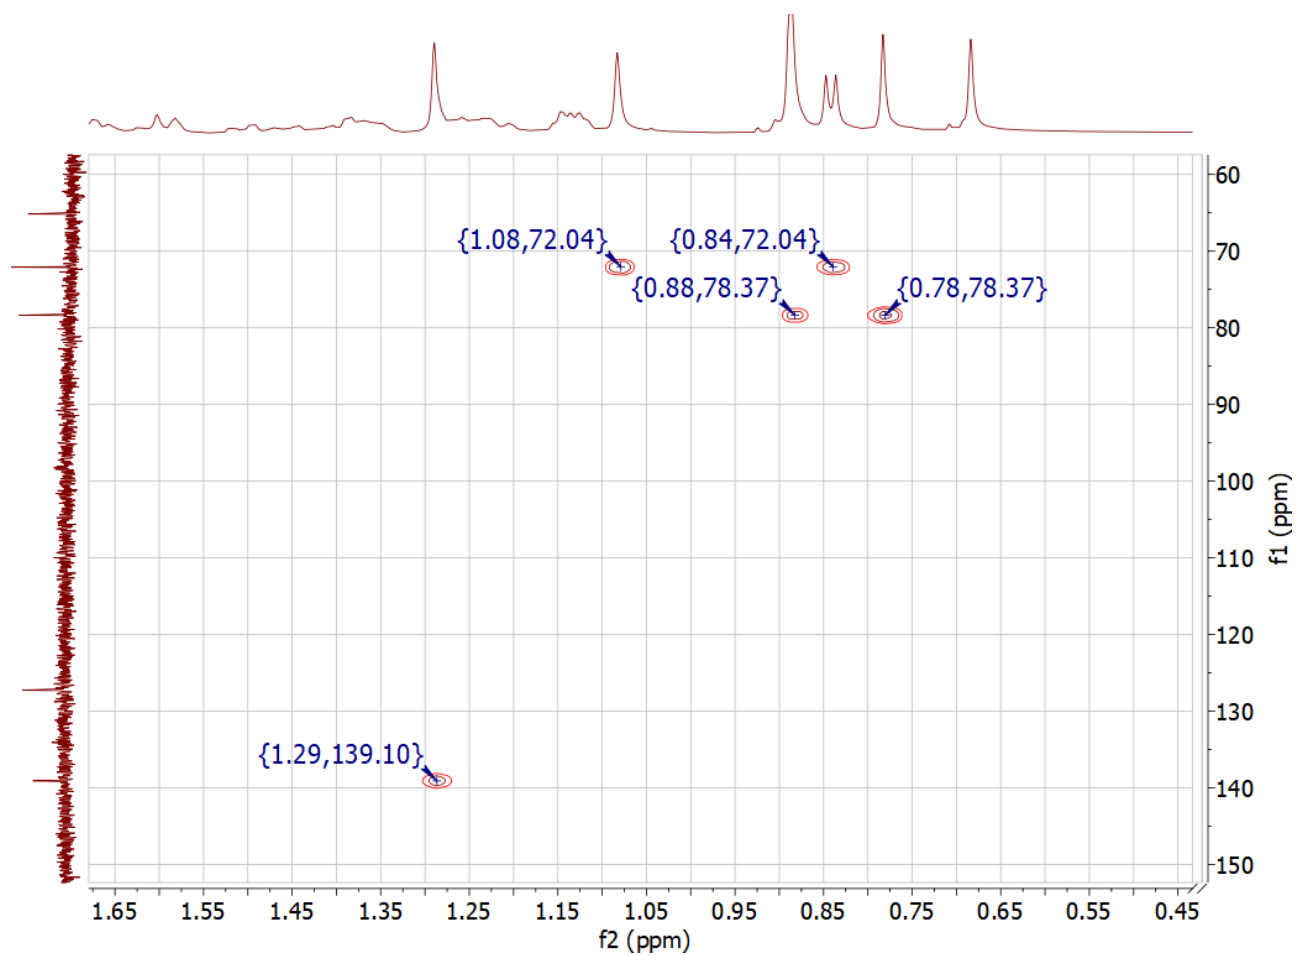

**Figure S19.**  $R_t$  23.31 min peak  $^1\text{H}$ - $^{13}\text{C}$  NMR correlation (HMBC) spectrum, zoom over 60 to 150 ppm ( $f_1$ ) and 0.45 to 1.65 ppm ( $f_2$ ). Tormentonic acid.

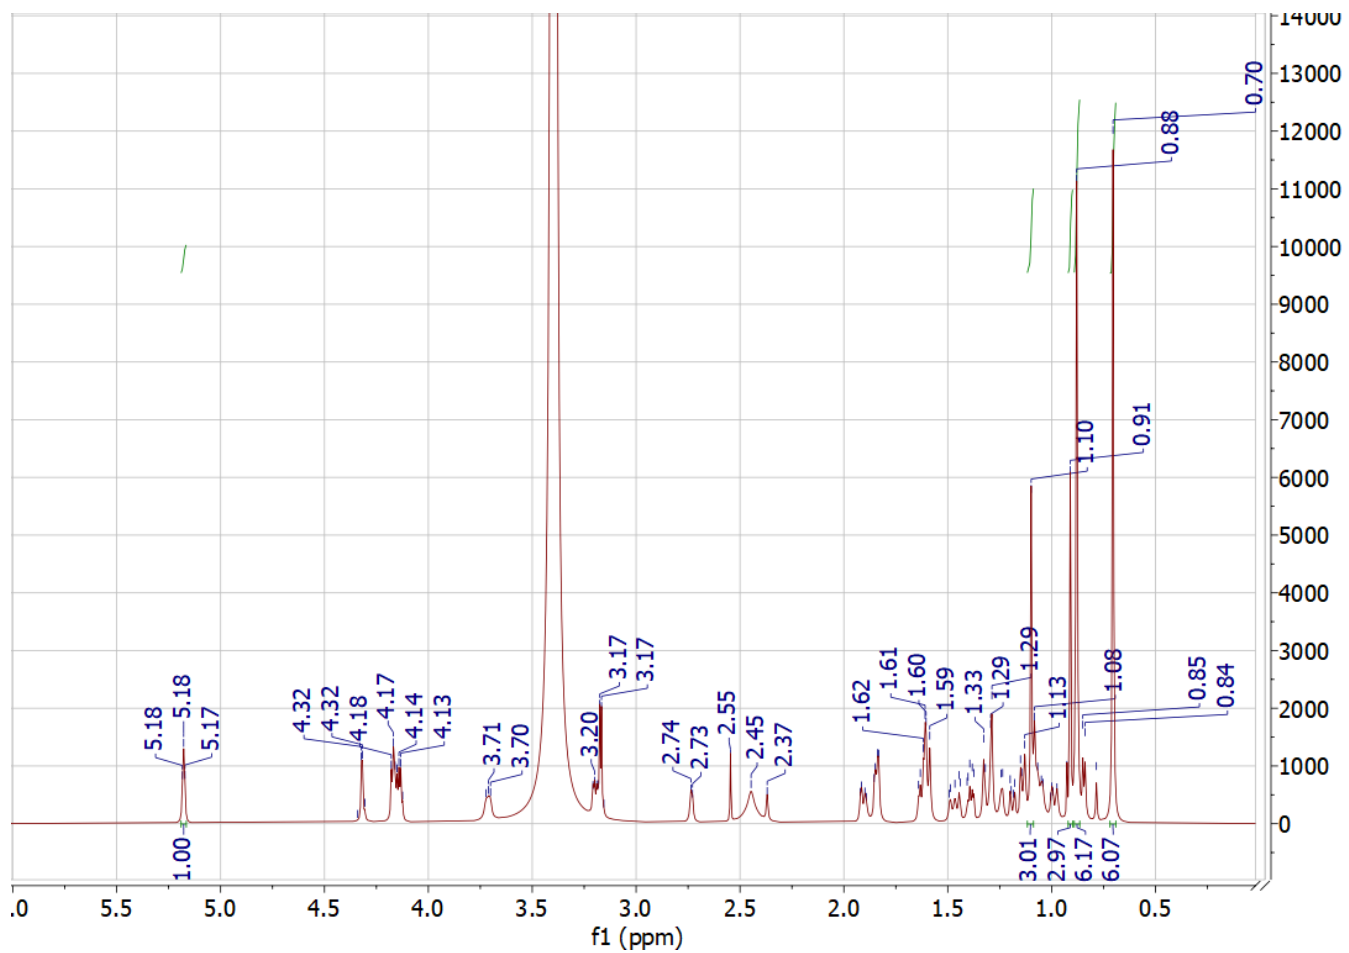

**Figure S20.**  $R_t$  27.47 min peak <sup>1</sup>H-NMR spectrum. Hederagenic acid.

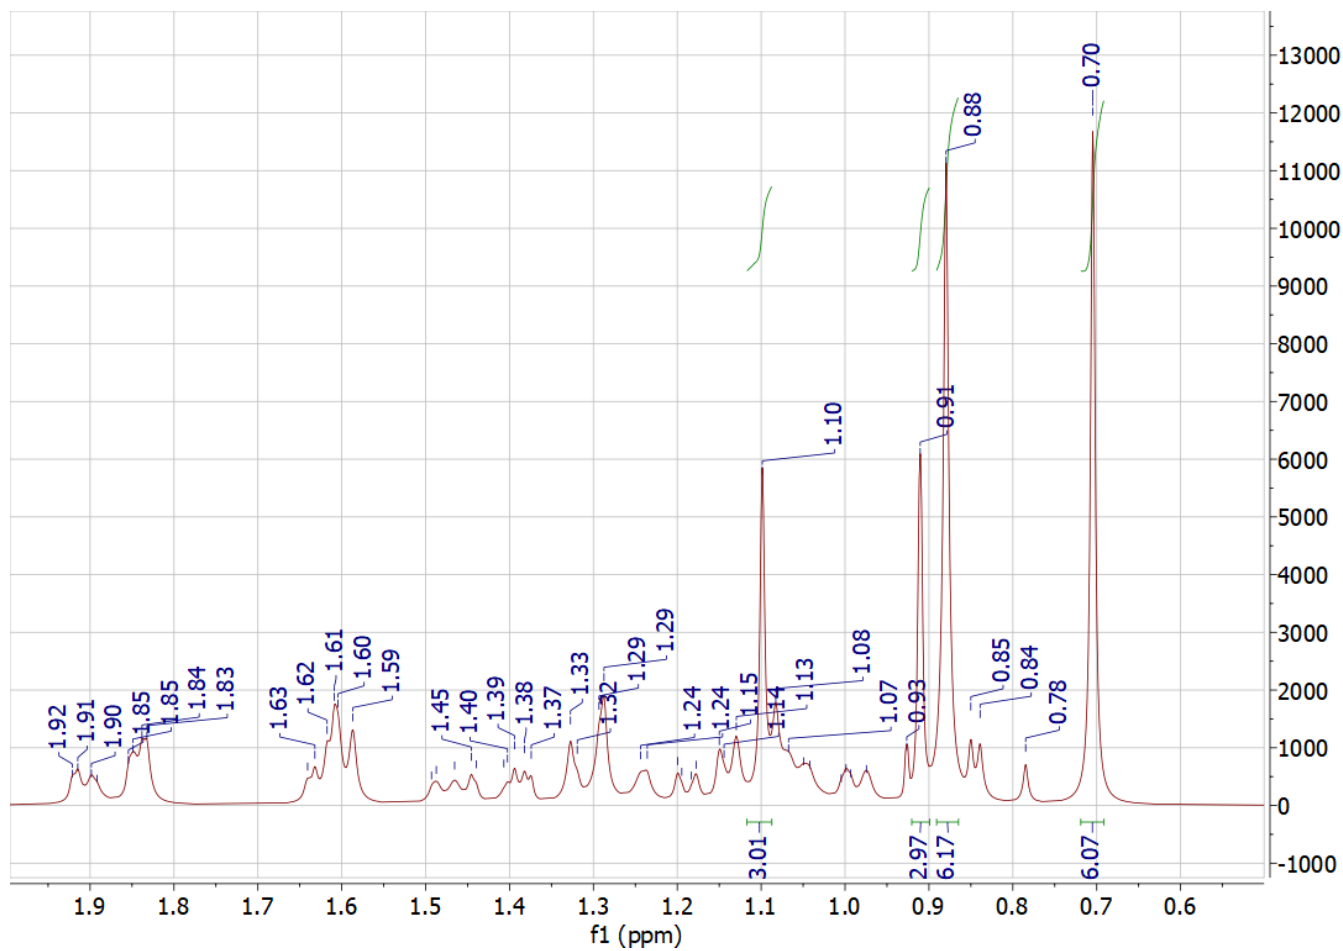

**Figure S21.**  $R_t$  27.47 min peak <sup>1</sup>H-NMR spectrum, zoom from 0.5 to 2.0 ppm. Hederagenic acid.

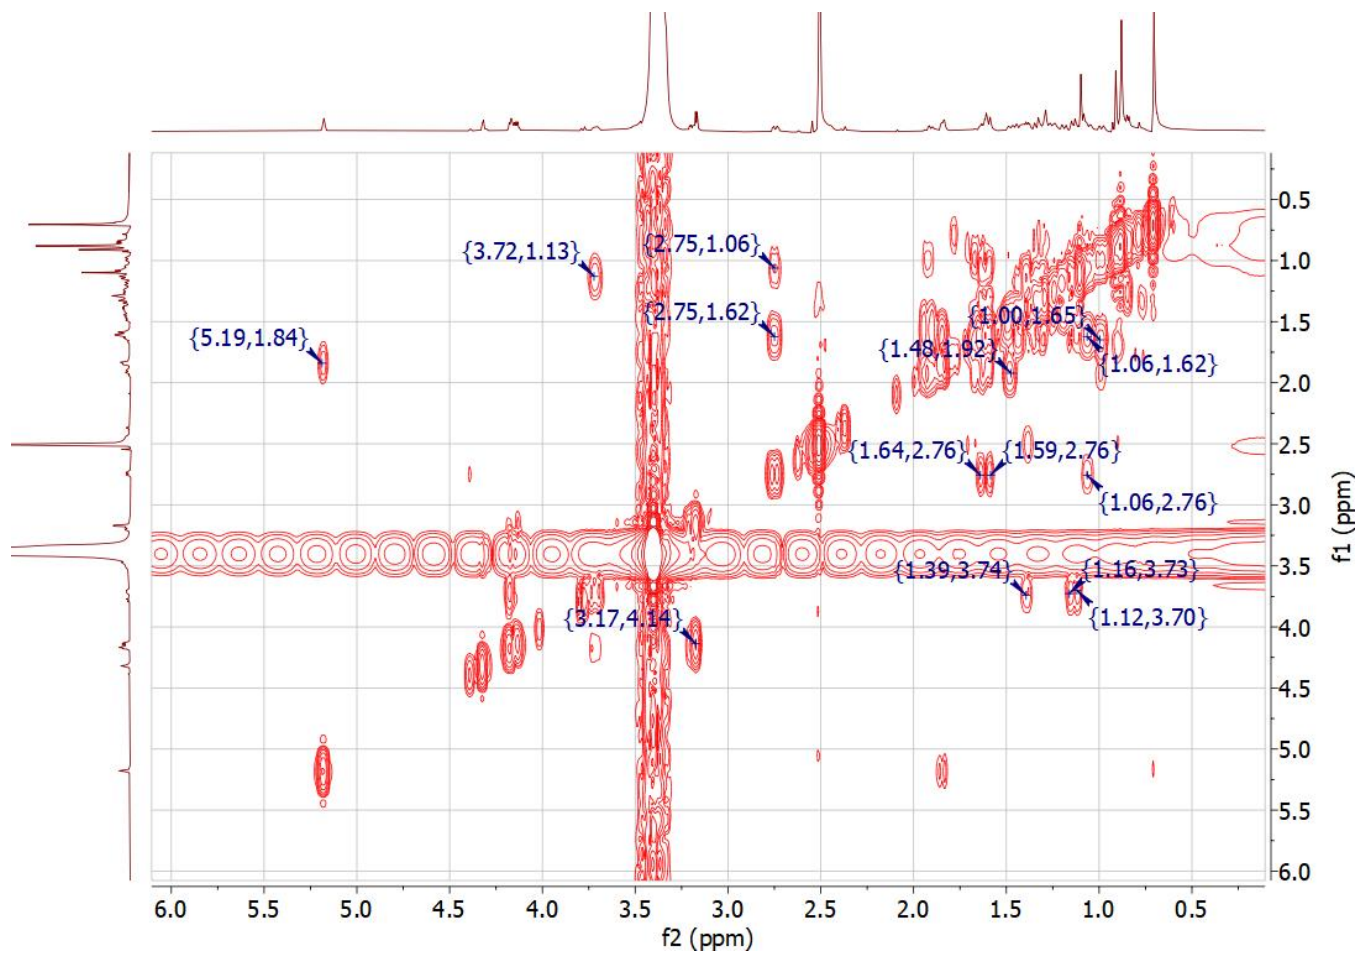

**Figure S22.**  $R_t$  27.47 min peak  $^1\text{H}$ - $^1\text{H}$  NMR correlation (COSY) spectrum. Hederagenic acid.



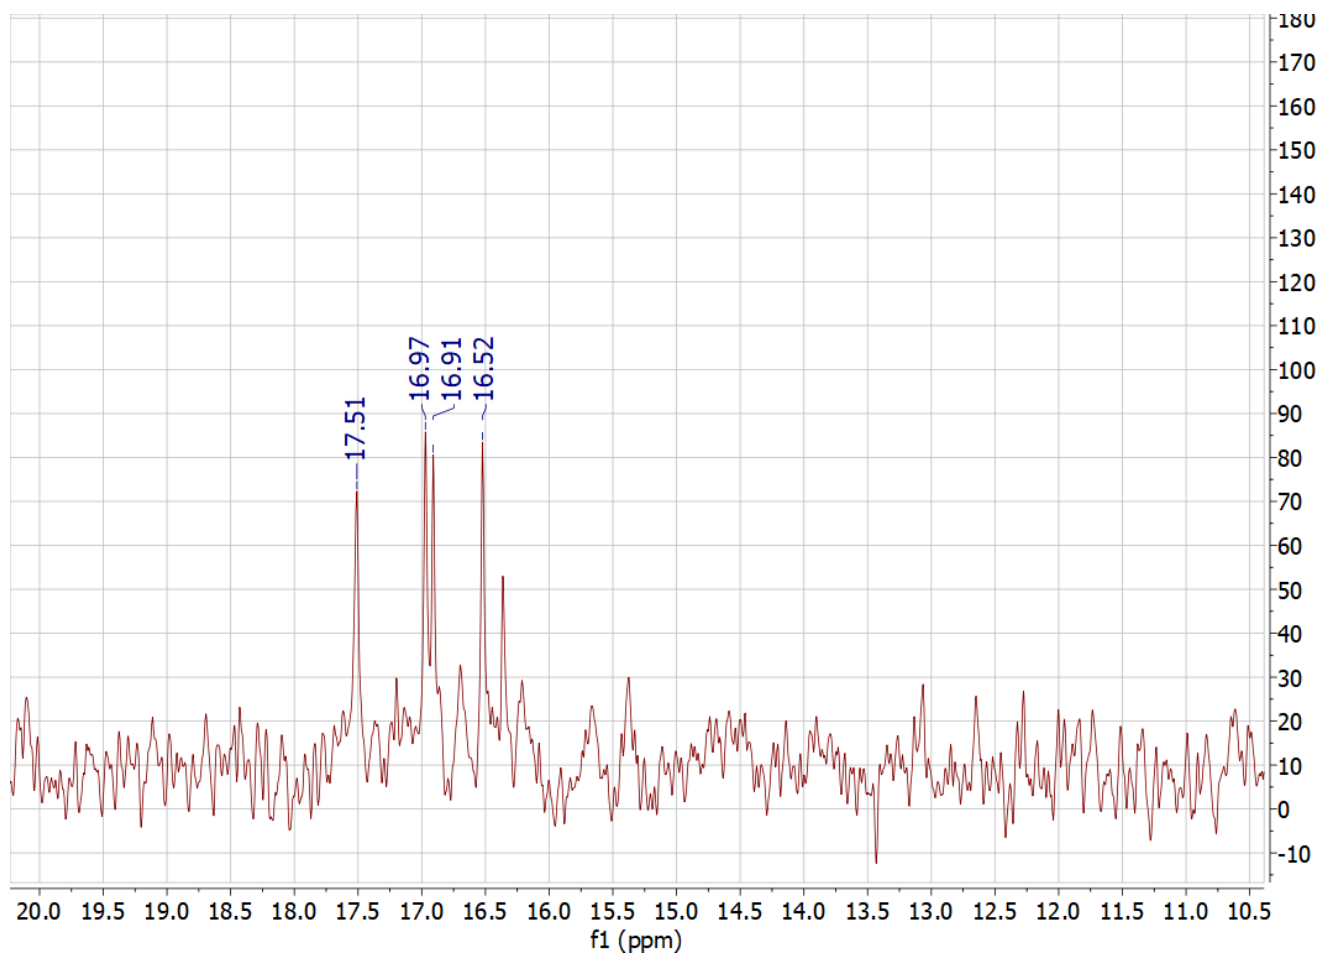

**Figure S23.**  $R_t$  27.47 min peak  $^{13}\text{C}$ -NMR spectrum, zoom over 10 to 20 ppm region. Hederagenic acid.

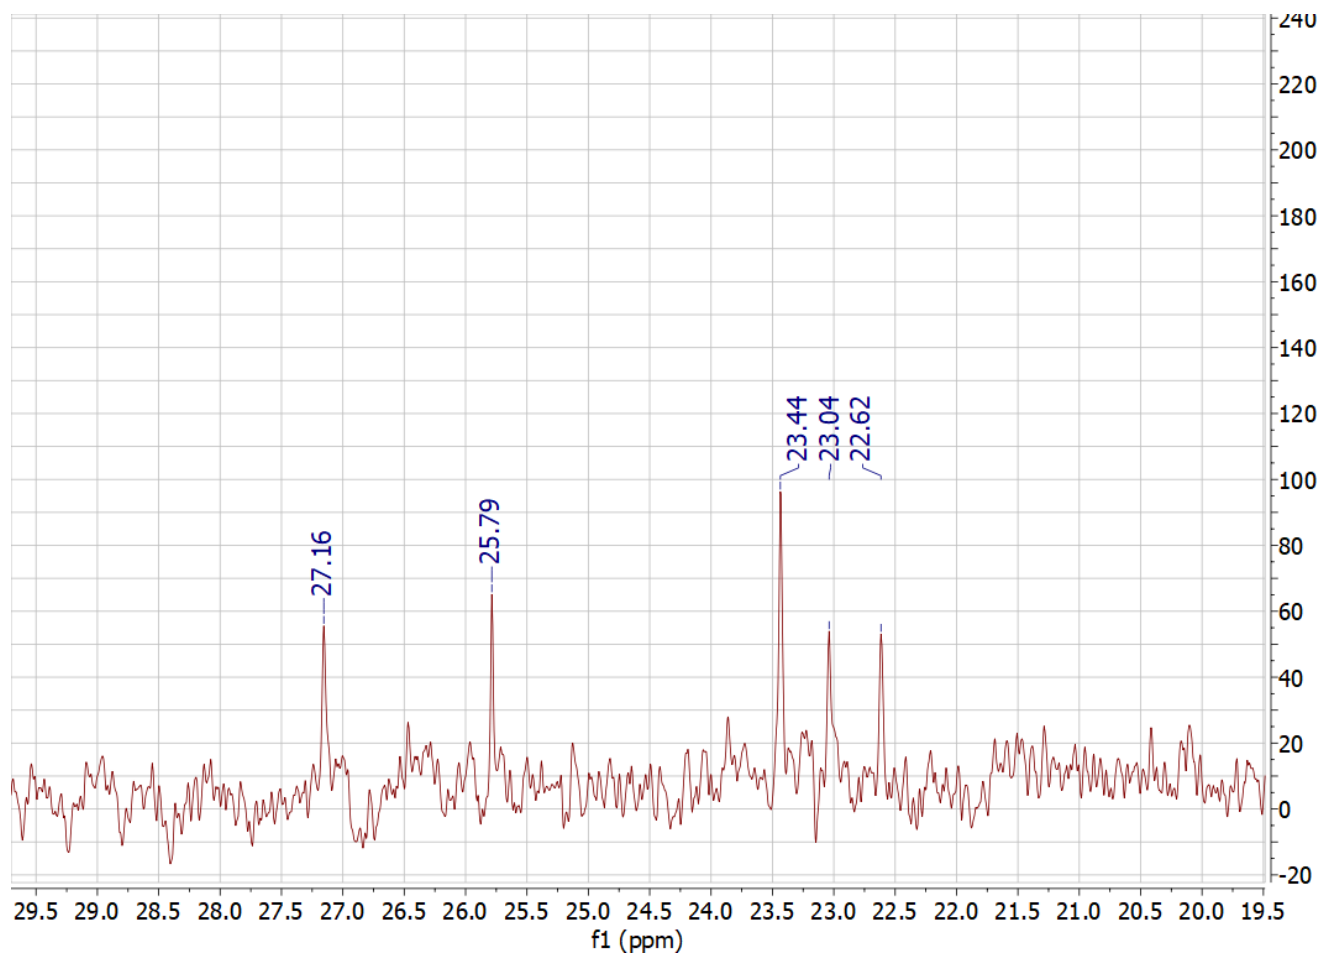

**Figure S24.**  $R_t$  27.47 min peak  $^{13}\text{C}$ -NMR spectrum, zoom over 20 to 30 ppm region. Hederagenic acid.

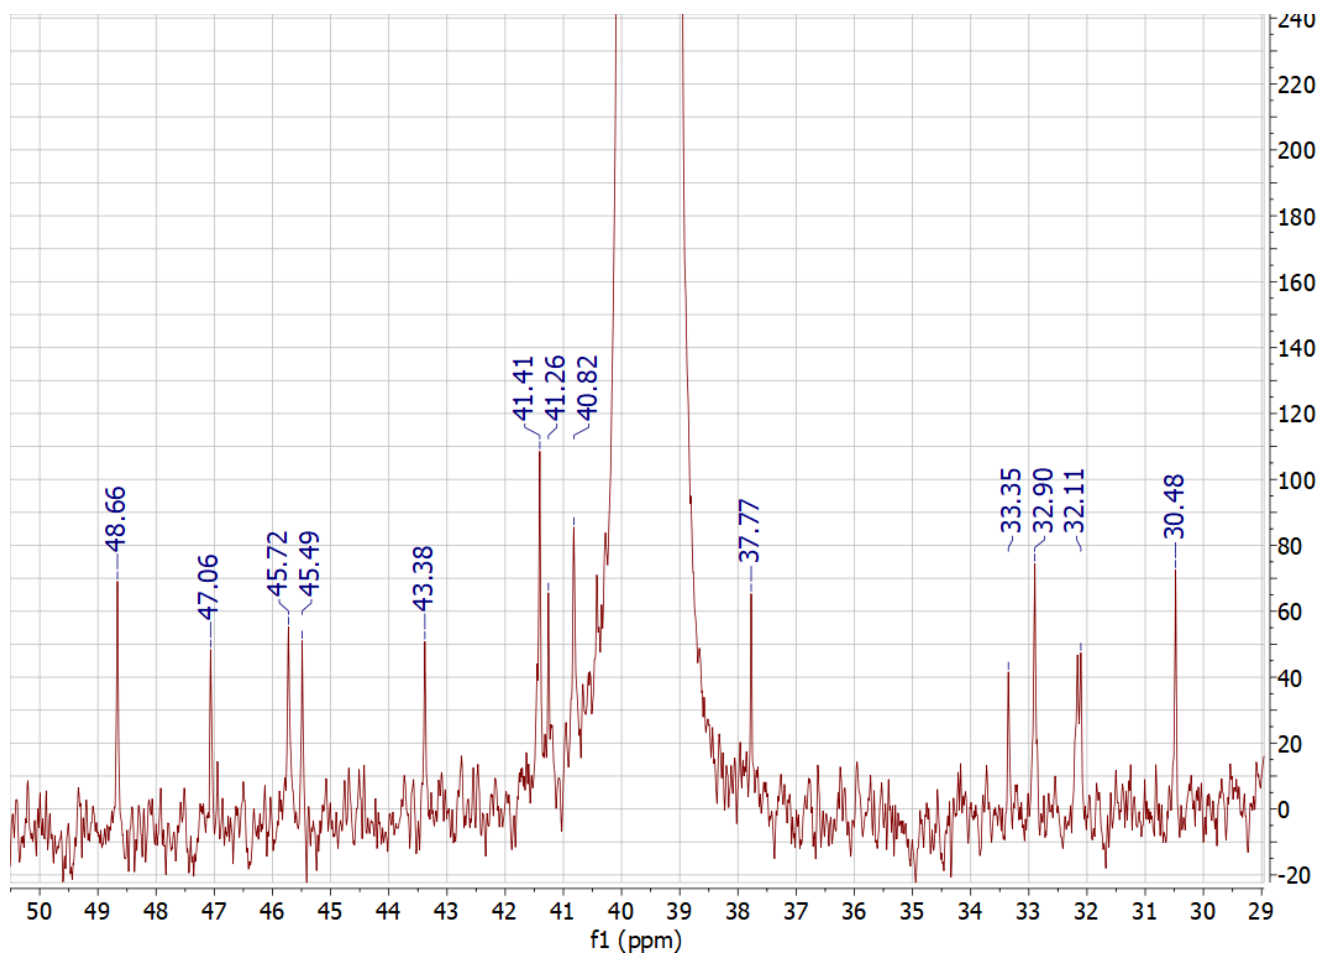

**Figure S25.**  $R_t$  27.47 min peak  $^{13}\text{C}$ -NMR spectrum, zoom over 30 to 50 ppm region. Hederagenic acid.

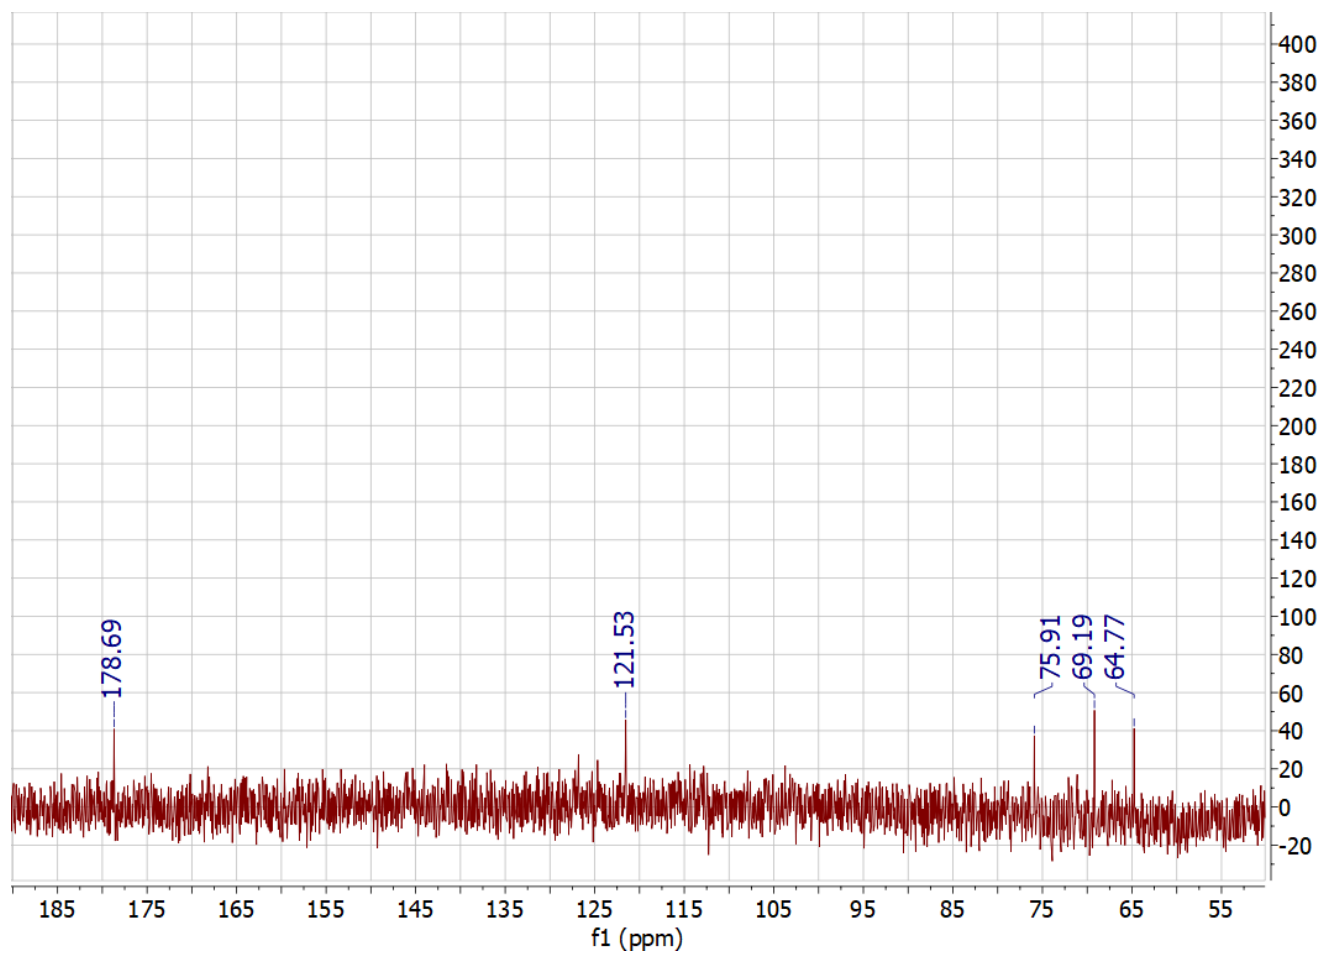

**Figure S26.**  $R_t$  27.47 min peak  $^{13}\text{C}$ -NMR spectrum, zoom over 50 to 185 ppm region. Hederagenic acid.

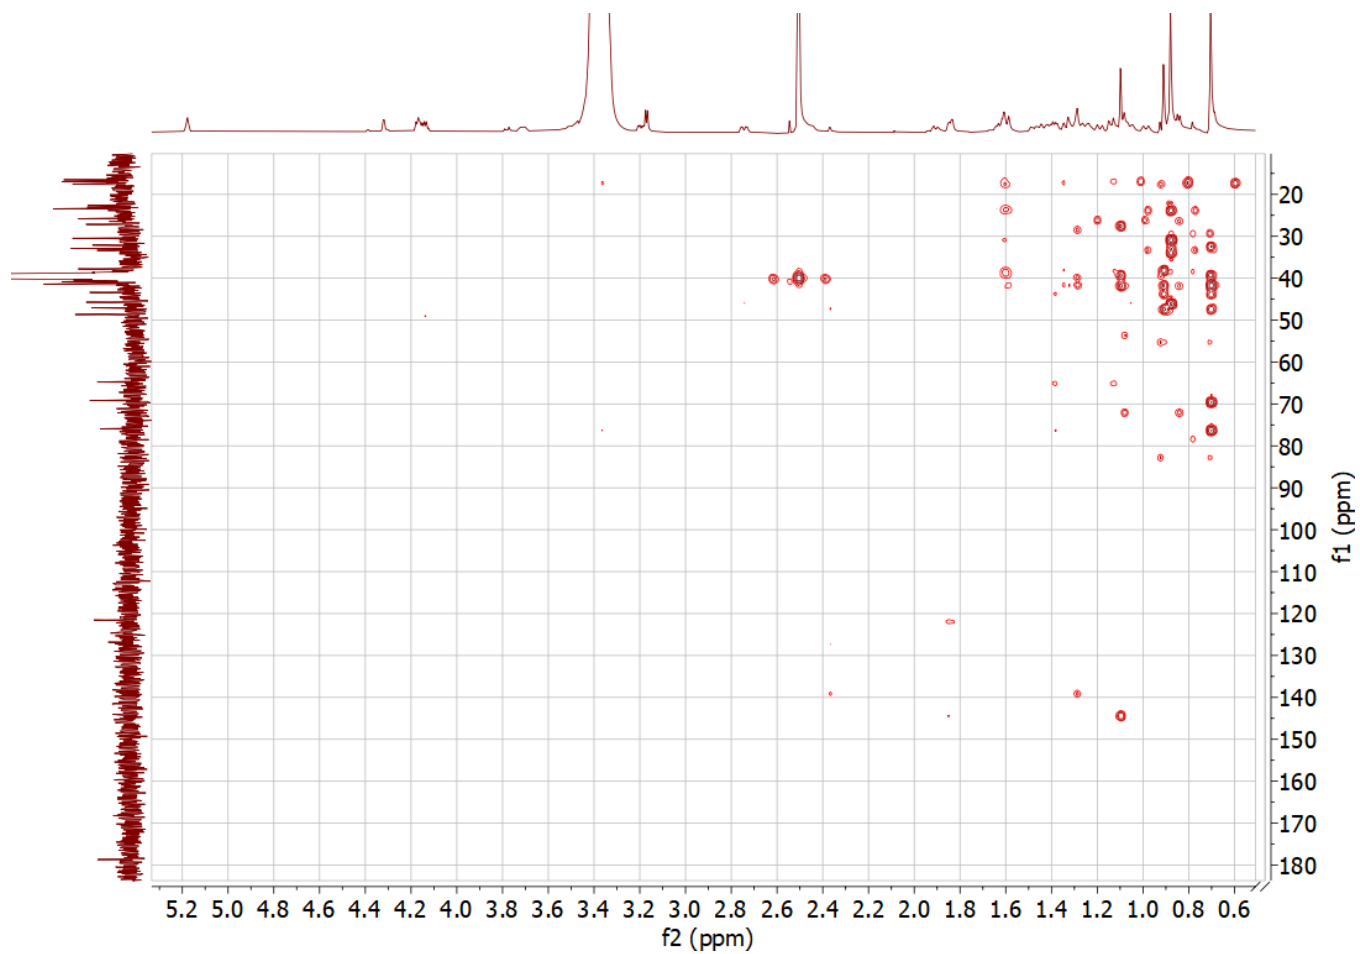

**Figure S27.**  $R_t$  27.47 min peak  $^1\text{H}$ - $^{13}\text{C}$  NMR correlation (HMBC) spectrum. Hederagenic acid.

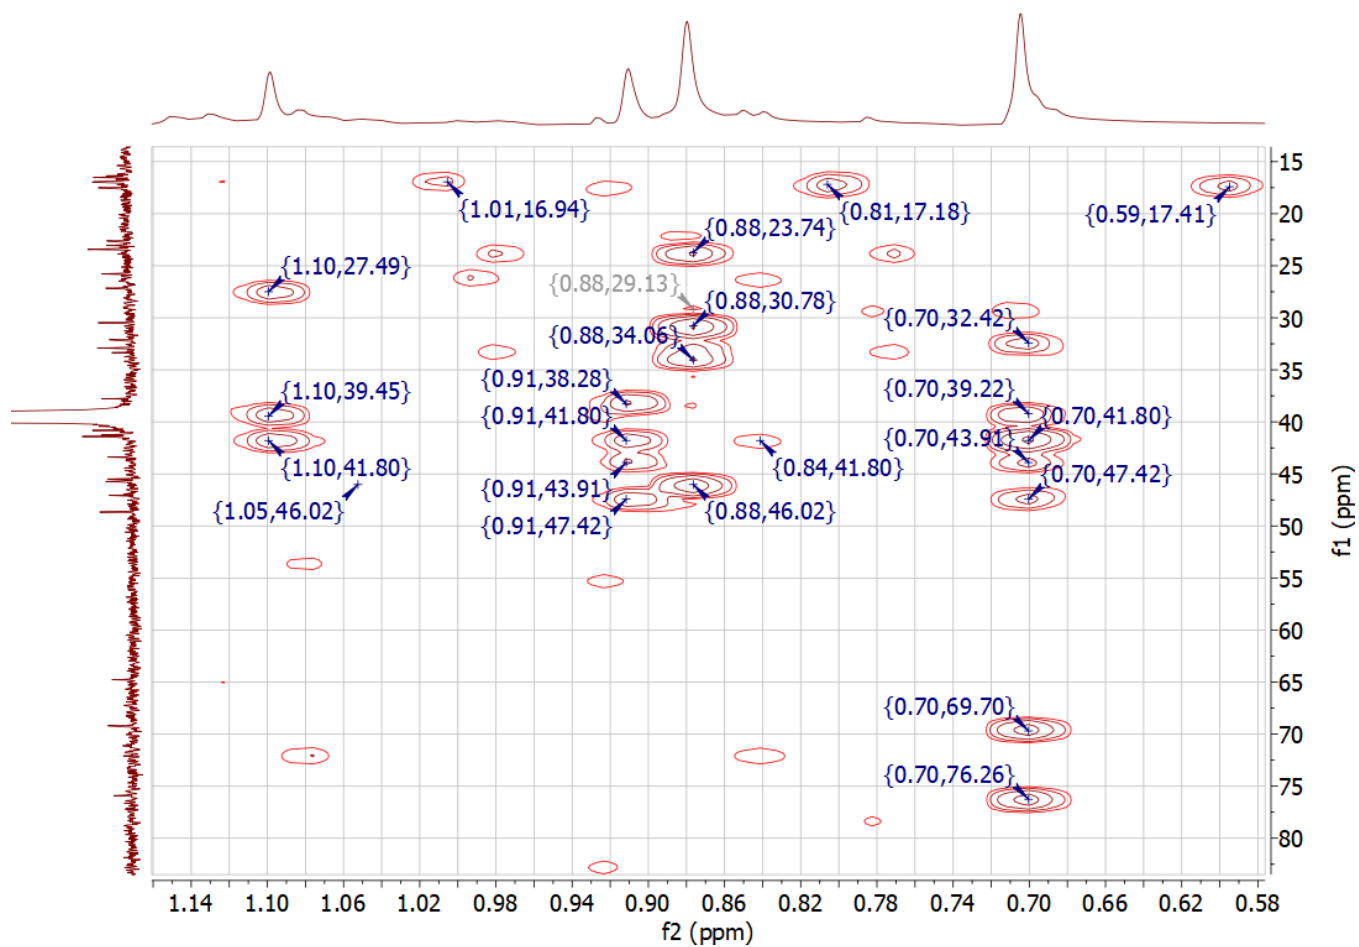

**Figure S28.**  $R_t$  27.47 min peak  $^1\text{H}$ - $^{13}\text{C}$  NMR correlation (HMBC) spectrum, zoom over 15 to 80 ppm ( $f_1$ ) and 0.58 to 1.14 ppm ( $f_2$ ). Hederagenic acid.

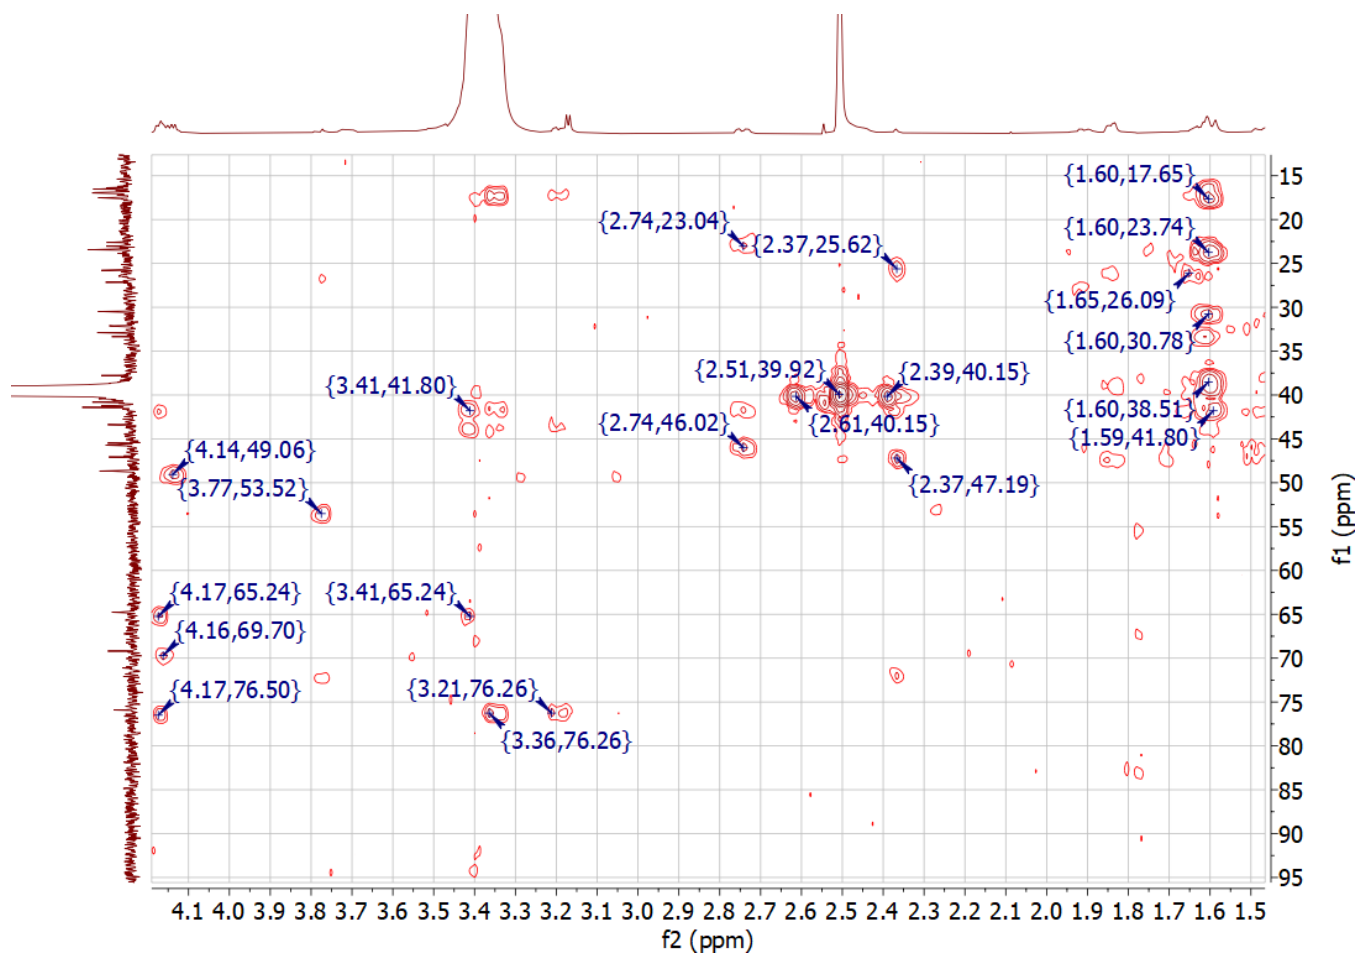

**Figure S29.**  $R_t$  27.47 min peak  $^1\text{H}$ - $^{13}\text{C}$  NMR correlation (HMBC) spectrum, zoom over 15 to 95 ppm ( $f_1$ ) and 1.50 to 4.20 ppm ( $f_2$ ). Hederagenic acid.

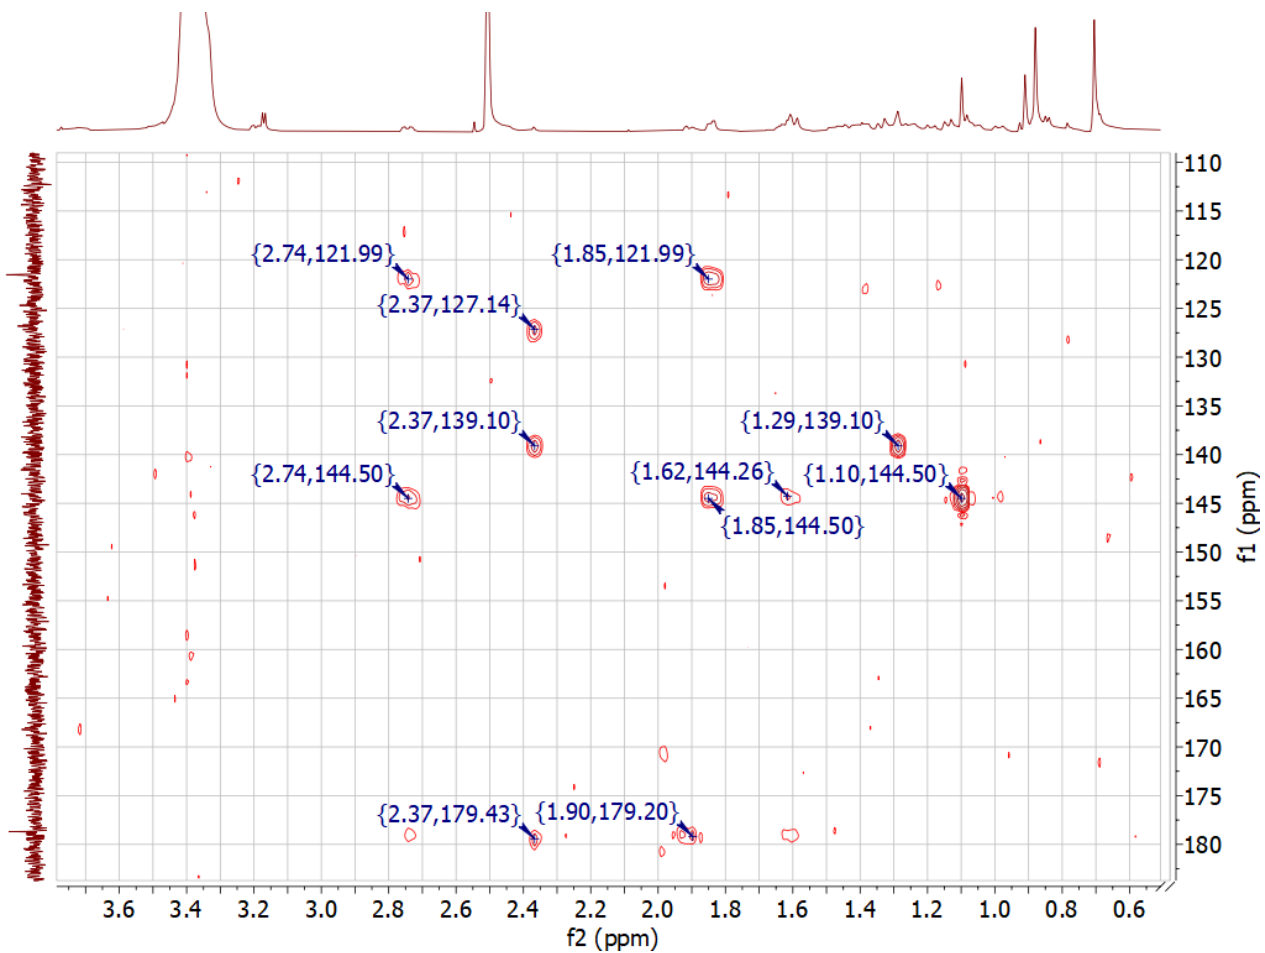

**Figure S30.**  $R_t$  27.47 min peak  $^1\text{H}$ - $^{13}\text{C}$  NMR correlation (HMBC) spectrum, zoom over 110 to 180 ppm ( $f_1$ ) and 0.60 to 3.60 ppm ( $f_2$ ). Hederagenic acid.



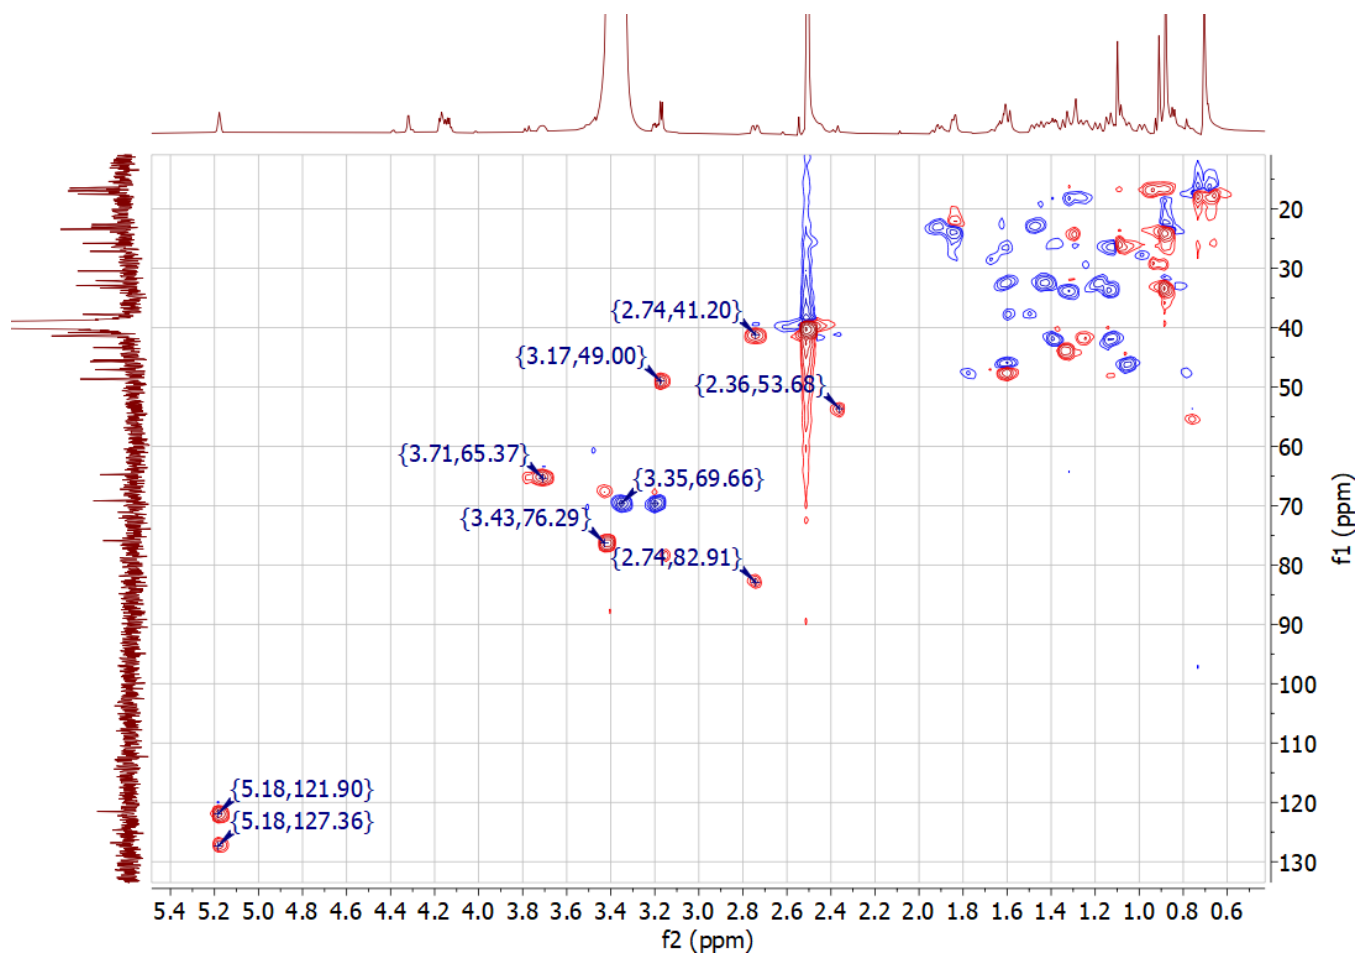

**Figure S31.**  $R_t$  27.47 min peak  $^1\text{H}$ - $^{13}\text{C}$  NMR correlation (HSQC) spectrum. Hederagenic acid.

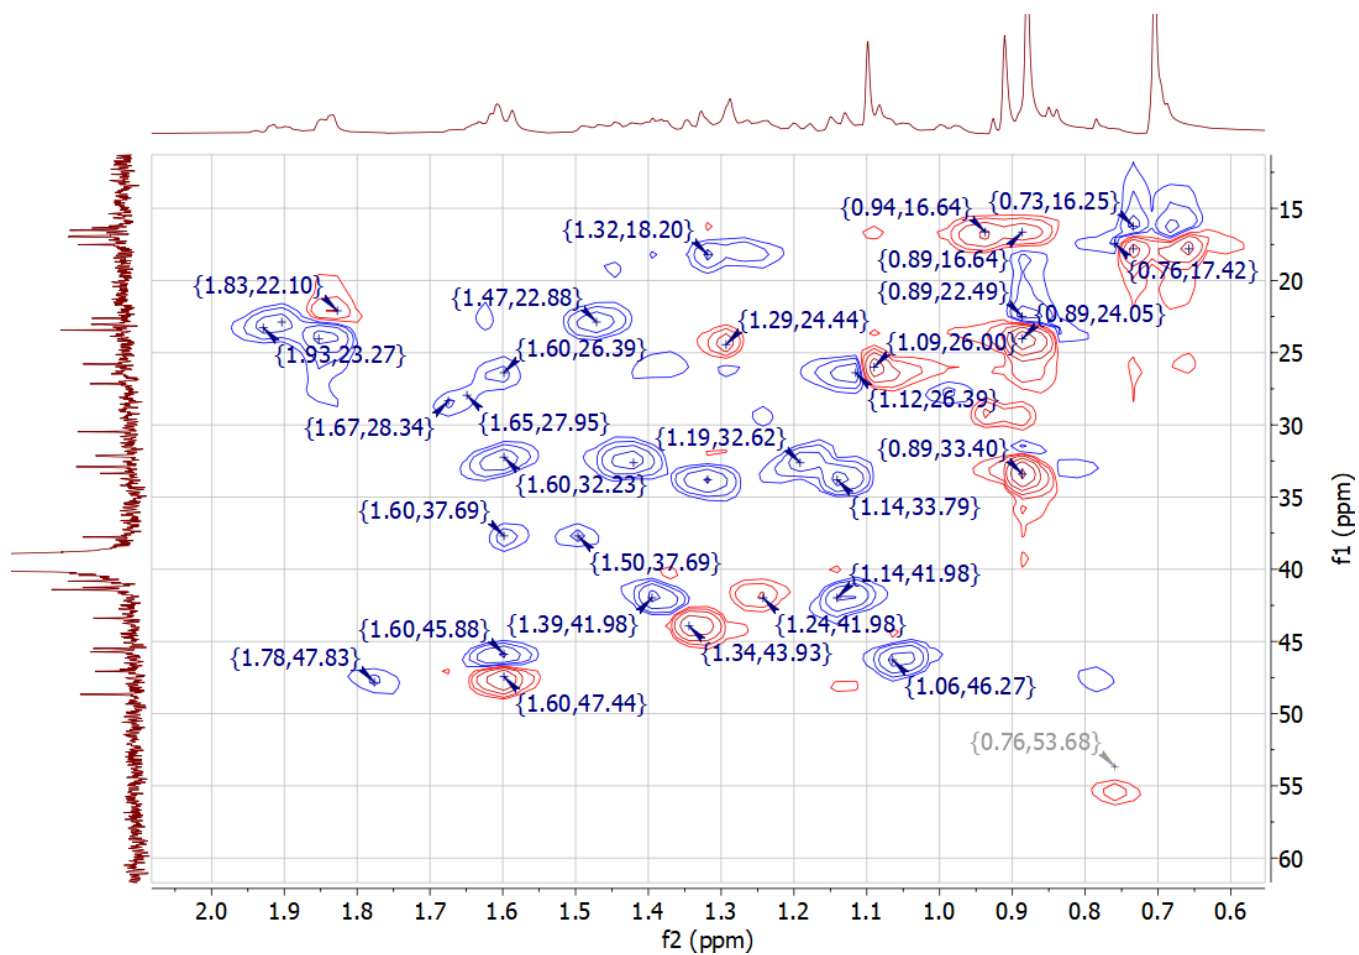

**Figure S32.**  $R_t$  27.47 min peak  $^1\text{H}$ - $^{13}\text{C}$  NMR correlation (HSQC) spectrum, zoom over 15 to 60 ppm ( $f_1$ ) and 0.60 to 3.0 ppm ( $f_2$ ). Hederagenic acid.

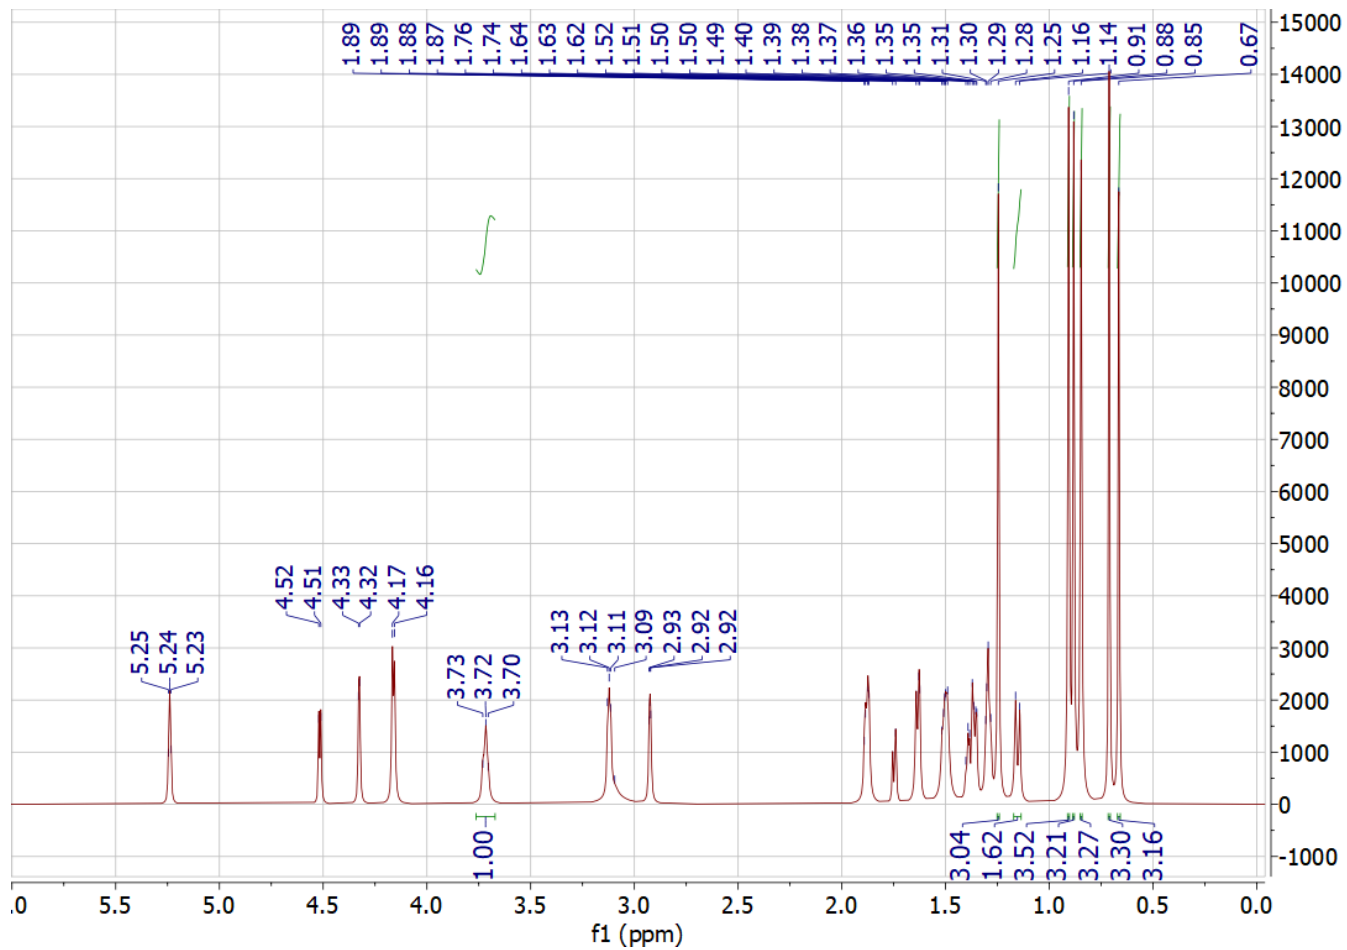

**Figure S33.**  $R_t$  28.57 min peak  $^1\text{H-NMR}$  spectrum. Arjunolic acid.

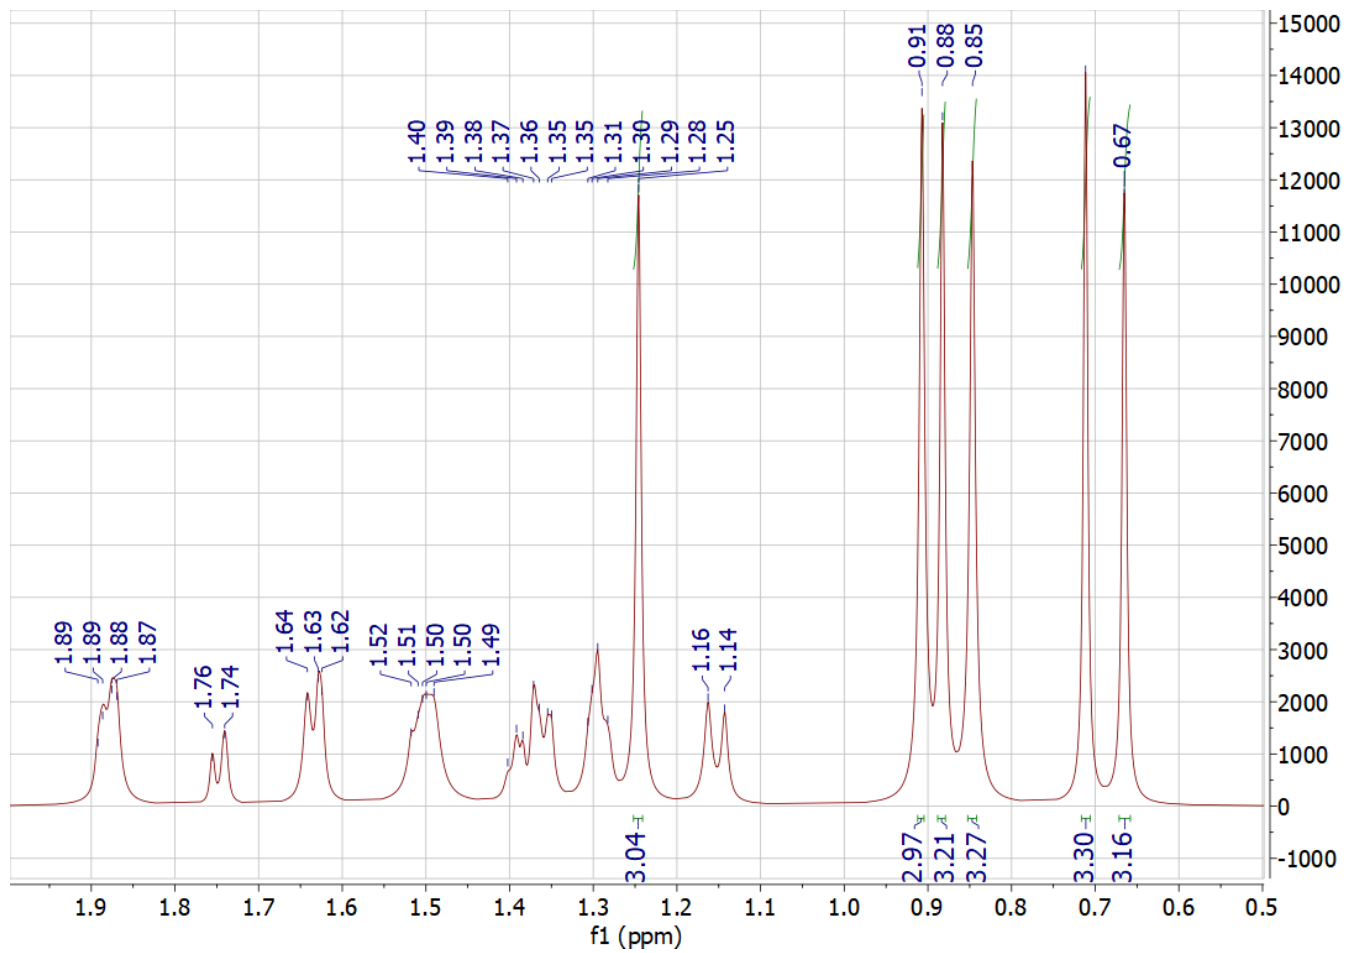

**Figure S34.**  $R_t$  28.57 min peak <sup>1</sup>H-NMR spectrum, zoom over 0.5 to 1.9 ppm region. Arjunolic acid.

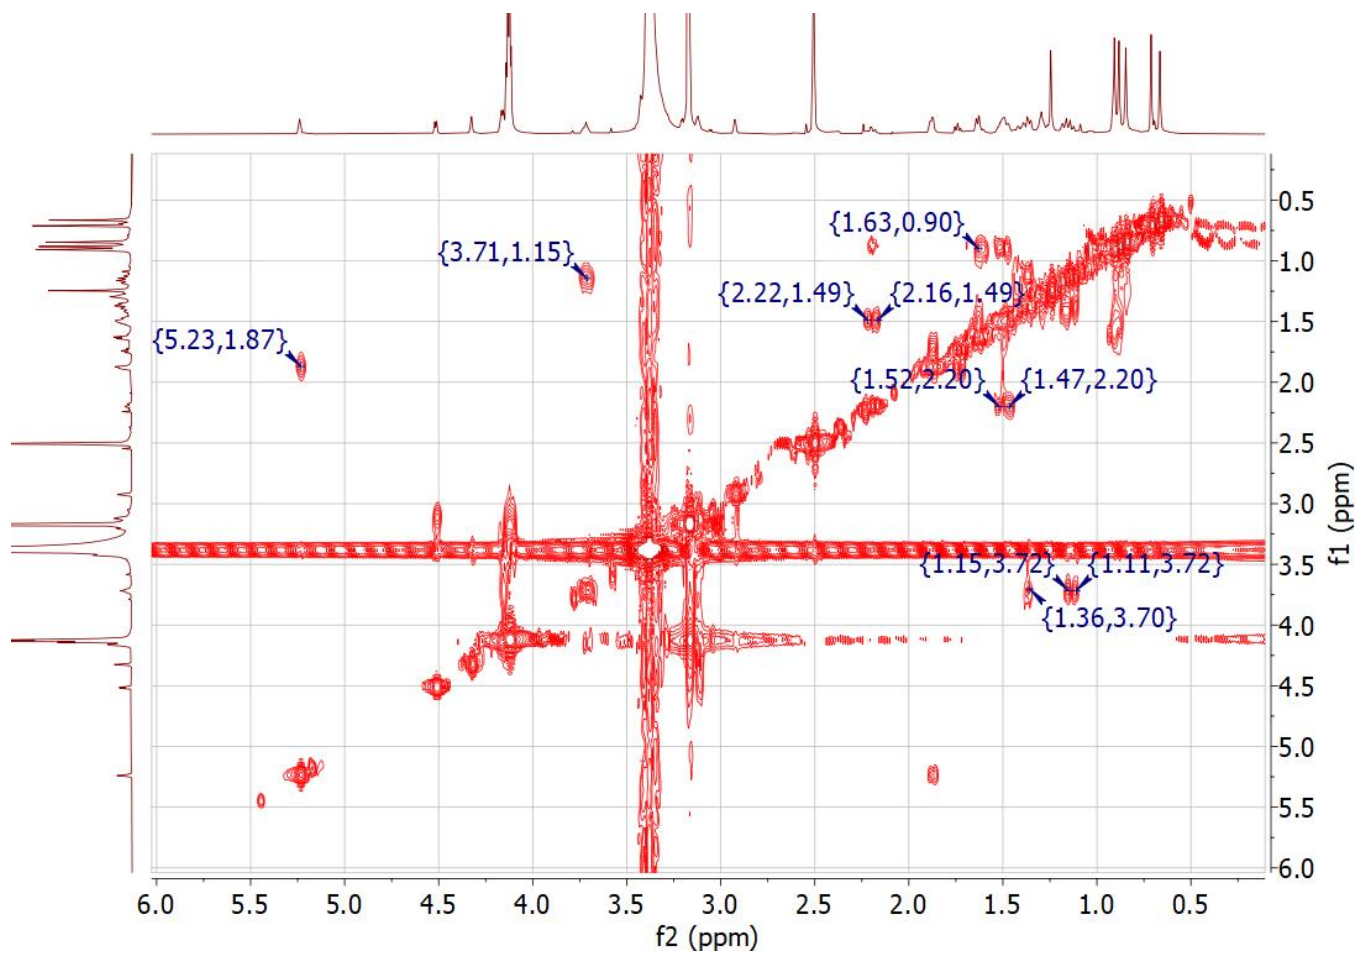

**Figure S35.**  $R_t$  28.57 min peak peak  $^1\text{H}$ - $^1\text{H}$  NMR correlation (COSY) spectrum. Arjunolic acid.

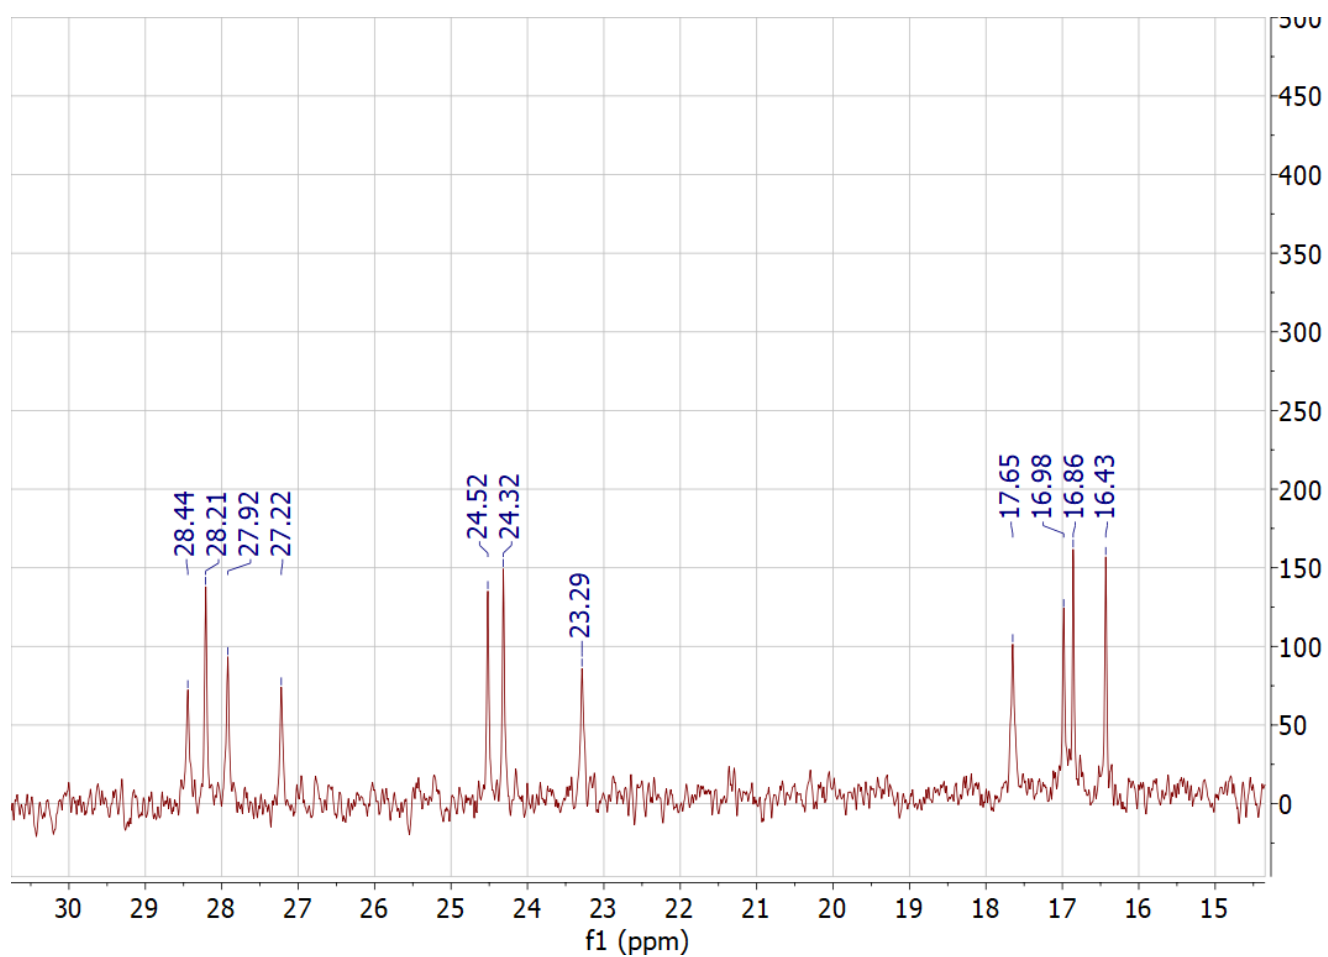

**Figure S36.**  $R_t$  28.57 min peak peak  $^{13}\text{C}$ -NMR spectrum, zoom over 15 to 30 ppm region. Arjunolic acid

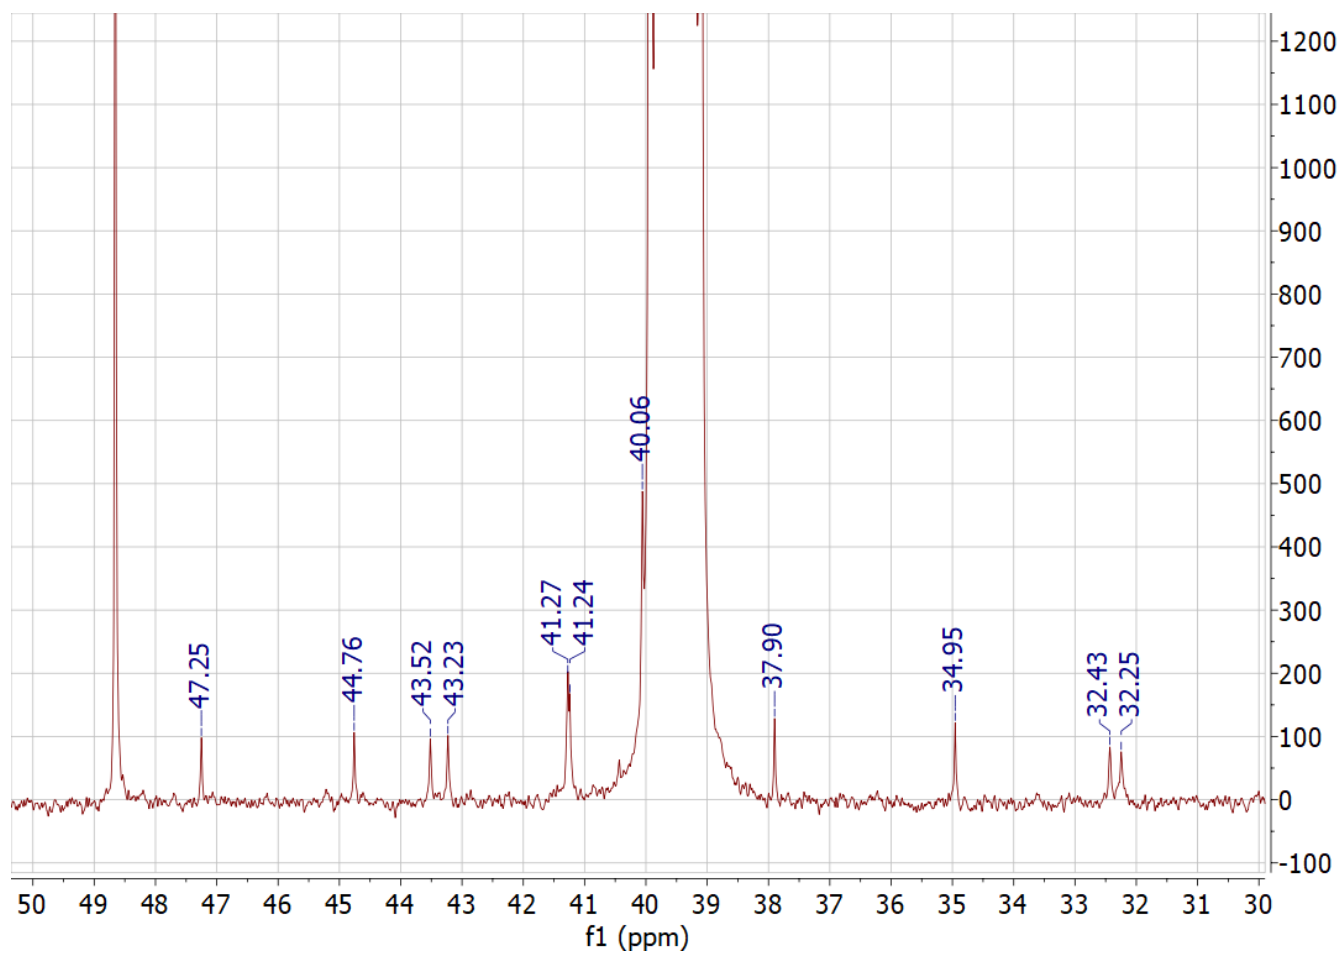

**Figure S37.**  $R_t$  28.57 min peak peak  $^{13}\text{C}$ -NMR spectrum, zoom over 30 to 50 ppm region. Arjunolic acid

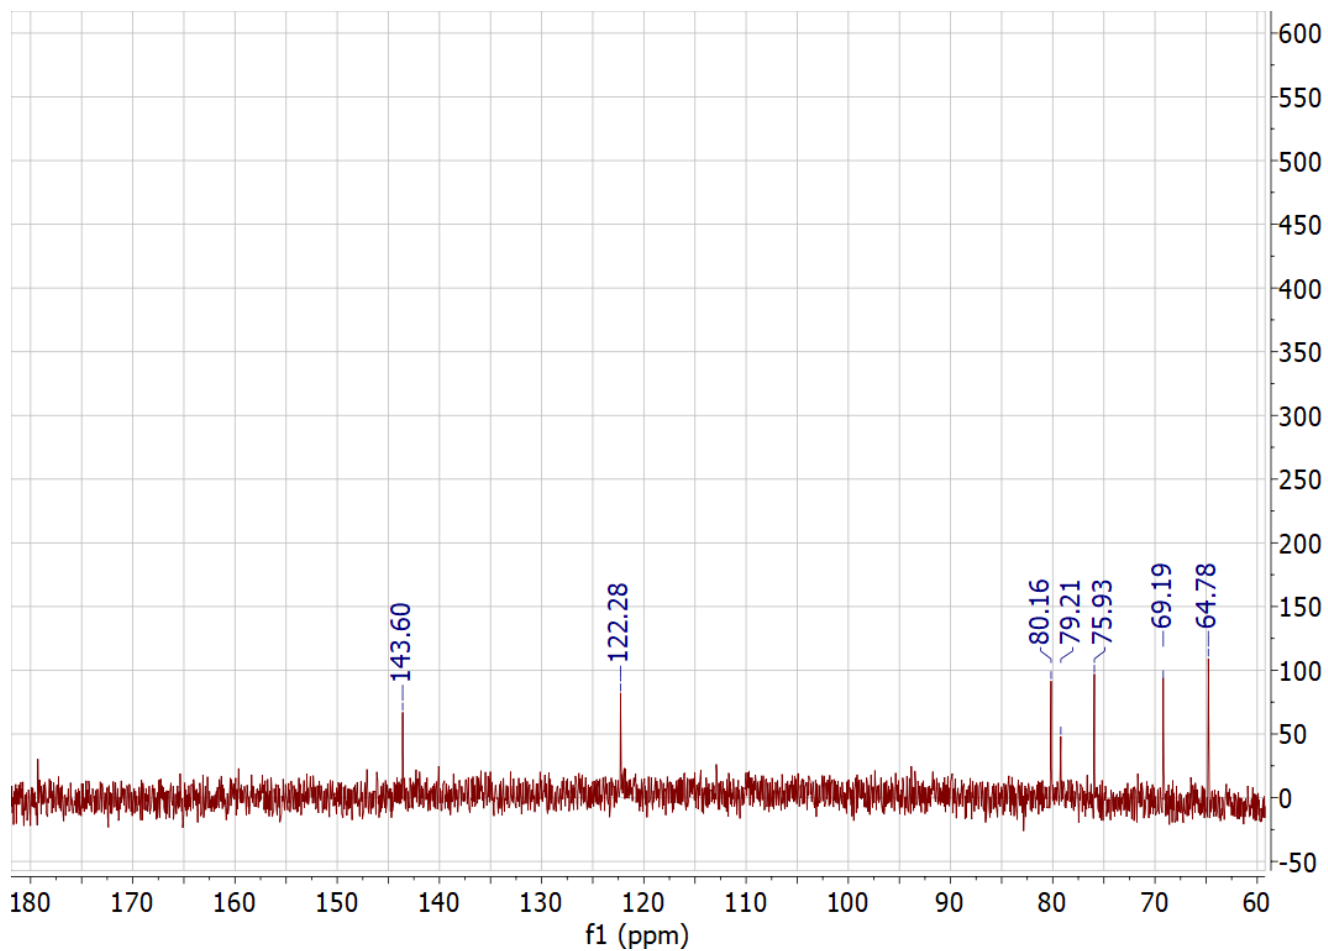

**Figure S38.**  $R_t$  28.57 min peak peak  $^{13}\text{C}$ -NMR spectrum, zoom over 60 to 180 ppm region. Arjunolic acid



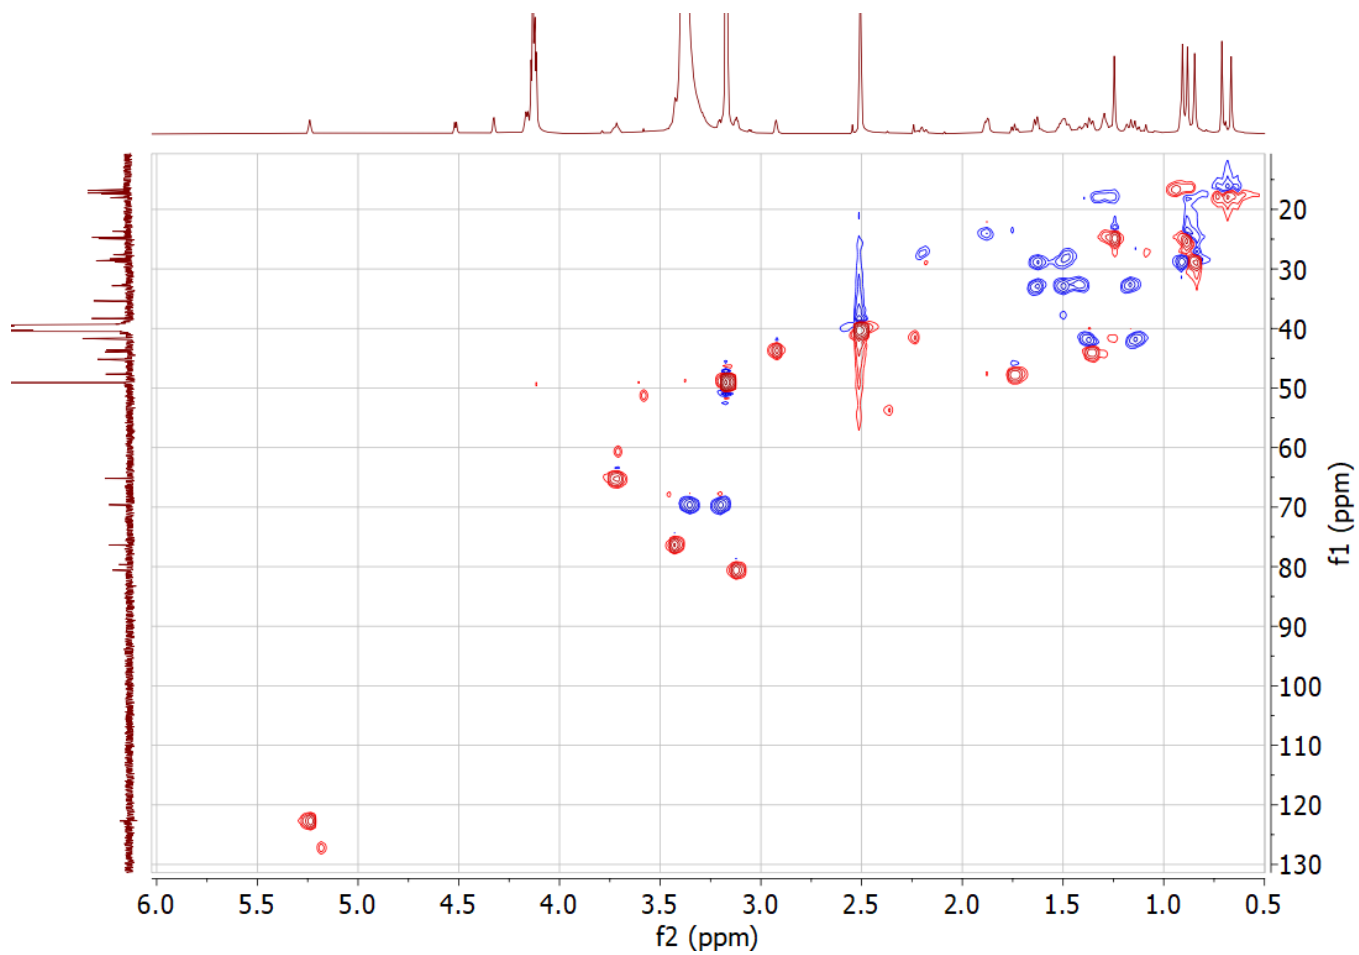

**Figure S39.**  $R_t$  28.57 min peak peak  $^1\text{H}$ - $^{13}\text{C}$  NMR correlation (HSQC) spectrum. Arjunolic acid

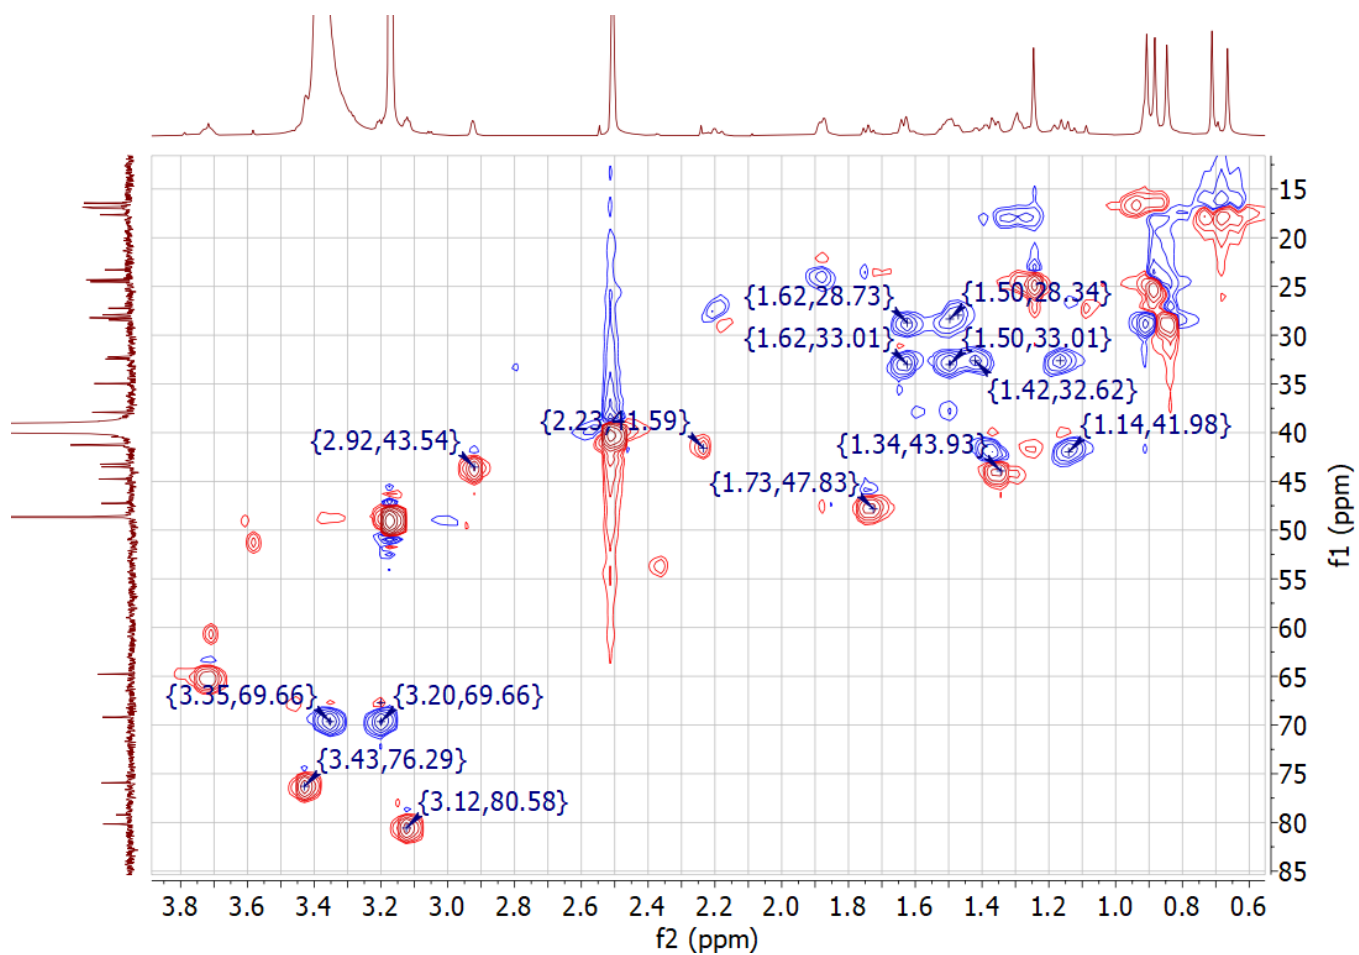

**Figure S40.**  $R_t$  28.57 min peak peak  $^1\text{H}$ - $^{13}\text{C}$  NMR correlation (HSQC) spectrum, 15 to 85 ppm ( $f_1$ ) and 0.60 to 3.8 ppm ( $f_2$ ). Arjunolic acid

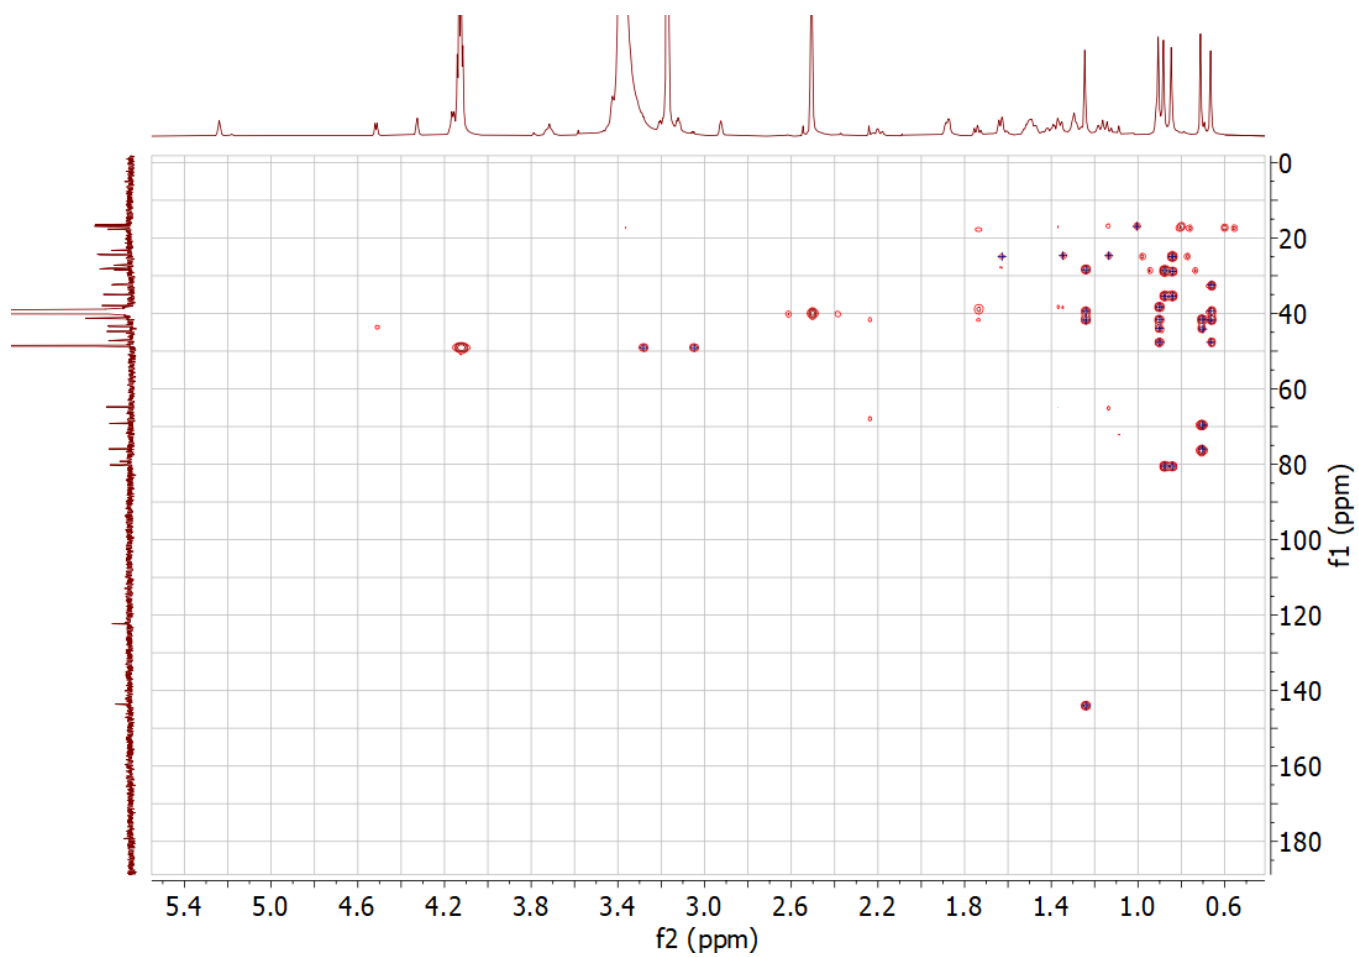

**Figure S41.**  $R_t$  28.57 min peak peak  $^1\text{H}$ - $^{13}\text{C}$  NMR correlation (HMBC) spectrum. Arjunolic acid

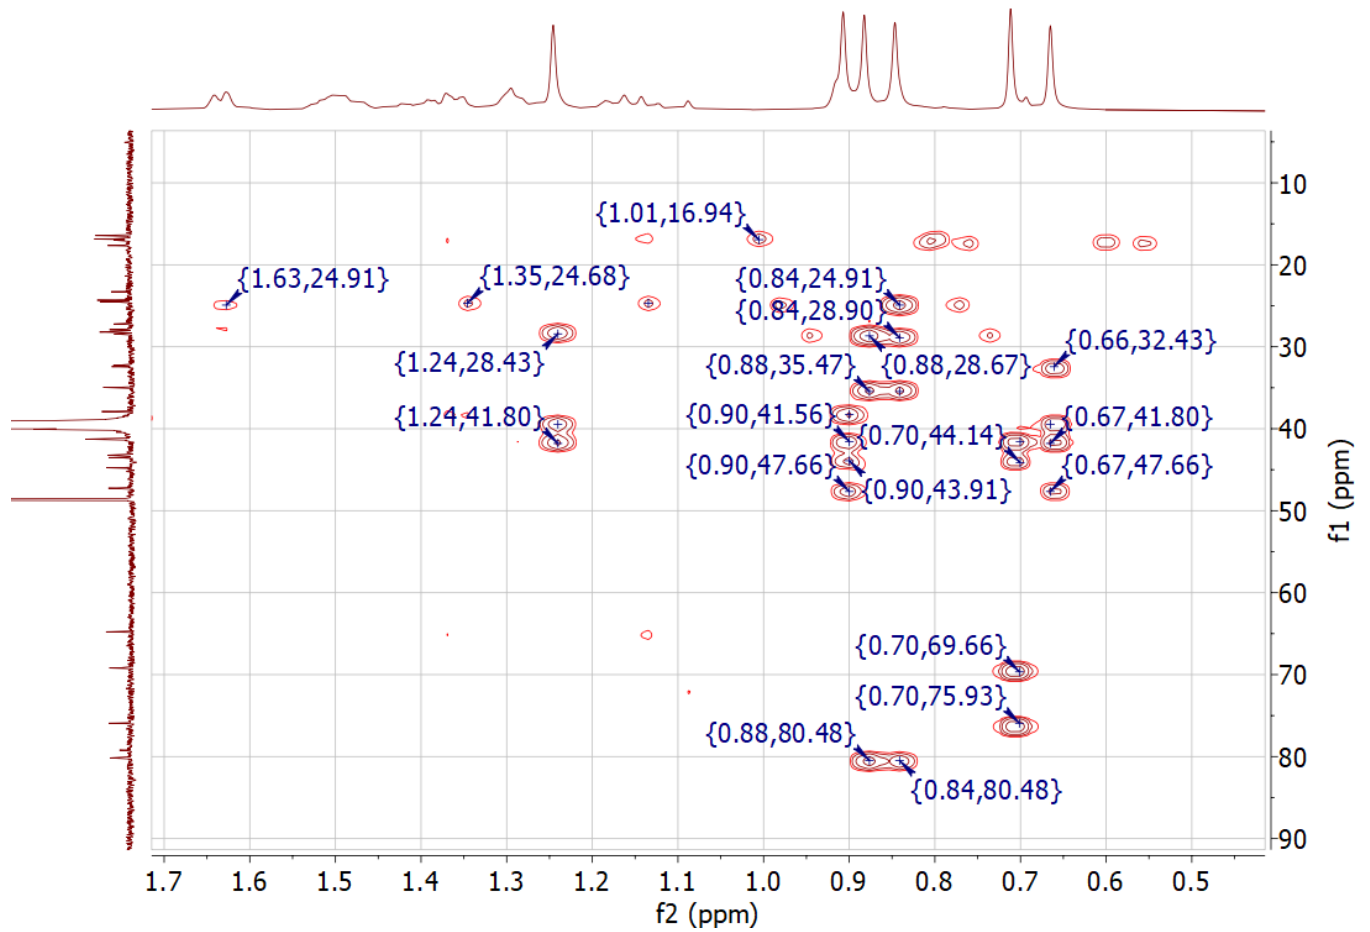

**Figure S42.**  $R_t$  28.57 min peak peak  $^1\text{H}$ - $^{13}\text{C}$  NMR correlation (HMBC) spectrum, 10 to 90 ppm ( $f_1$ ) and 0.50 to 1.7 ppm ( $f_2$ ). Arjunolic acid
